# Supplementary material for: Anti-Osteoclastogenic and Antibacterial Effects of Chlorinated Polyketides from the Beibu Gulf Coral-Derived Fungus Aspergillus unguis GXIMD 02505
Source: MDPI journal article supplement (doi:10.3390/md20030178), 2022-02-28
Supplement: s1 [file s1]

# Supplementary Materials

## Anti-osteoclastogenic and Antibacterial Effects of Chlorinated Polyketides from the Beibu Gulf Coral-derived Fungus *Aspergillus unguis* GXIMD 02505

Yanting Zhang <sup>1,†</sup>, Zhichao Li <sup>2,†</sup>, Bingyao Huang <sup>1</sup>, Kai Liu <sup>1</sup>, Shuai Peng <sup>1</sup>, Xinming Liu <sup>1</sup>,  
Chenghai Gao <sup>1</sup>, Yonghong Liu <sup>1,\*</sup>, Yanhui Tan <sup>2,\*</sup>, and Xiaowei Luo <sup>1,\*</sup>

<sup>1</sup> Institute of Marine Drugs, Guangxi University of Chinese Medicine, Nanning 530200, China;

<sup>2</sup> State Key Laboratory for Chemistry and Molecular Engineering of Medicinal Resources, School of Chemistry and Pharmaceutical Sciences, Guangxi Normal University, Guilin 541004, China;

\* Correspondence: yonghongliu@scsio.ac.cn (Y.L.); tyh533@126.com (Y.T.); luoxiaowei1991@126.com (X.L.).

† These authors contributed equally to this work.

## Contents of Supporting Information

|                                                                                                                                                 |    |
|-------------------------------------------------------------------------------------------------------------------------------------------------|----|
| <b>Figure S1.</b> <sup>1</sup> H NMR spectrum of Aspergillusether J (1) (methanol- <i>d</i> <sub>4</sub> , 500 MHz).....                        | 3  |
| <b>Figure S2.</b> <sup>13</sup> C NMR spectrum of Aspergillusether J (1) (methanol- <i>d</i> <sub>4</sub> , 125 MHz).....                       | 4  |
| <b>Figure S3.</b> DEPT 135 NMR spectrum of Aspergillusether J (1) (methanol- <i>d</i> <sub>4</sub> , 125 MHz).....                              | 5  |
| <b>Figure S4.</b> HSQC spectrum of Aspergillusether J (1) (methanol- <i>d</i> <sub>4</sub> ).....                                               | 6  |
| <b>Figure S5.</b> HMBC spectrum of Aspergillusether J (1) (methanol- <i>d</i> <sub>4</sub> ).....                                               | 7  |
| <b>Figure S6.</b> NOESY spectrum of Aspergillusether J (1) (methanol- <i>d</i> <sub>4</sub> ).....                                              | 8  |
| <b>Figure S7.</b> HRESIMS spectrum of Aspergillusether J (1).....                                                                               | 9  |
| <b>Figure S8.</b> UV spectrum of Aspergillusether J (1).....                                                                                    | 10 |
| <b>Figure S9.</b> IR spectrum of Aspergillusether J (1).....                                                                                    | 10 |
| <b>Figure S10.</b> <sup>1</sup> H NMR spectrum of Aspergillusidone H (3) (methanol- <i>d</i> <sub>4</sub> , 700 MHz).....                       | 11 |
| <b>Figure S11.</b> <sup>13</sup> C NMR spectrum of Aspergillusidone H (3) (methanol- <i>d</i> <sub>4</sub> , 175 MHz).....                      | 12 |
| <b>Figure S12.</b> DEPT 135 NMR spectrum of Aspergillusidone H (3) (methanol- <i>d</i> <sub>4</sub> , 175 MHz).....                             | 13 |
| <b>Figure S13.</b> HSQC spectrum of Aspergillusidone H (3) (methanol- <i>d</i> <sub>4</sub> ).....                                              | 14 |
| <b>Figure S14.</b> HMBC spectrum of Aspergillusidone H (3) (methanol- <i>d</i> <sub>4</sub> ).....                                              | 15 |
| <b>Figure S15.</b> NOESY spectrum of Aspergillusidone H (3) (methanol- <i>d</i> <sub>4</sub> ).....                                             | 16 |
| <b>Figure S16.</b> HRESIMS spectrum of Aspergillusidone H (3).....                                                                              | 17 |
| <b>Figure S17.</b> UV spectrum of Aspergillusidone H (3).....                                                                                   | 18 |
| <b>Figure S18.</b> IR spectrum of Aspergillusidone H (3).....                                                                                   | 18 |
| <b>Figure S19.</b> X ray crystal structure of compound 2.....                                                                                   | 19 |
| <b>Table S1.</b> Energies of 8 at MMFF94 force field.....                                                                                       | 19 |
| <b>Table S2.</b> Energies of 8 at B3LYP/6–31+g(d) level in methanol.....                                                                        | 20 |
| <b>Figure S20.</b> The optimized conformers and equilibrium populations of 8.....                                                               | 23 |
| Physicochemical data of known compounds 2, 4–8.....                                                                                             | 23 |
| <b>Figure S21.</b> Anti-MRSA activity of compounds 1–8 by agar diffusion method. (CHL: Chloramphenicol; SM: Streptomycin; AMP: Ampicillin)..... | 25 |
| <b>Figure S22.</b> Anti- <i>M. variabilis</i> activity of compounds 1–8 by agar diffusion method.....                                           | 25 |
| <b>Figure S23.</b> Anti- <i>M. jannaschii</i> activity of compounds 1–8 by agar diffusion method.....                                           | 26 |
| <b>Figure S24.</b> Anti- <i>V. Pelagius</i> activity of compound 4 by agar diffusion method.....                                                | 26 |
| <b>Figure S25.</b> Anti-MRSA activity of compounds 1, 2, 4, 6, 7 and ampicillin.....                                                            | 26 |
| <b>Figure S26.</b> Anti- <i>M. variabilis</i> activity of compounds 1, 2, 4, 6–8 and positive control.....                                      | 27 |
| <b>Figure S27.</b> Anti- <i>M. jannaschii</i> activity of compounds 1, 2, 4, 6, 8 and positive control.....                                     | 27 |
| <b>Figure S28.</b> Anti- <i>V. Pelagius</i> activity of compounds 4 and nalidixic acid.....                                                     | 28 |
| <b>The ITS sequence of <i>Aspergillus unguis</i> GXIMD 02505</b> .....                                                                          | 28 |

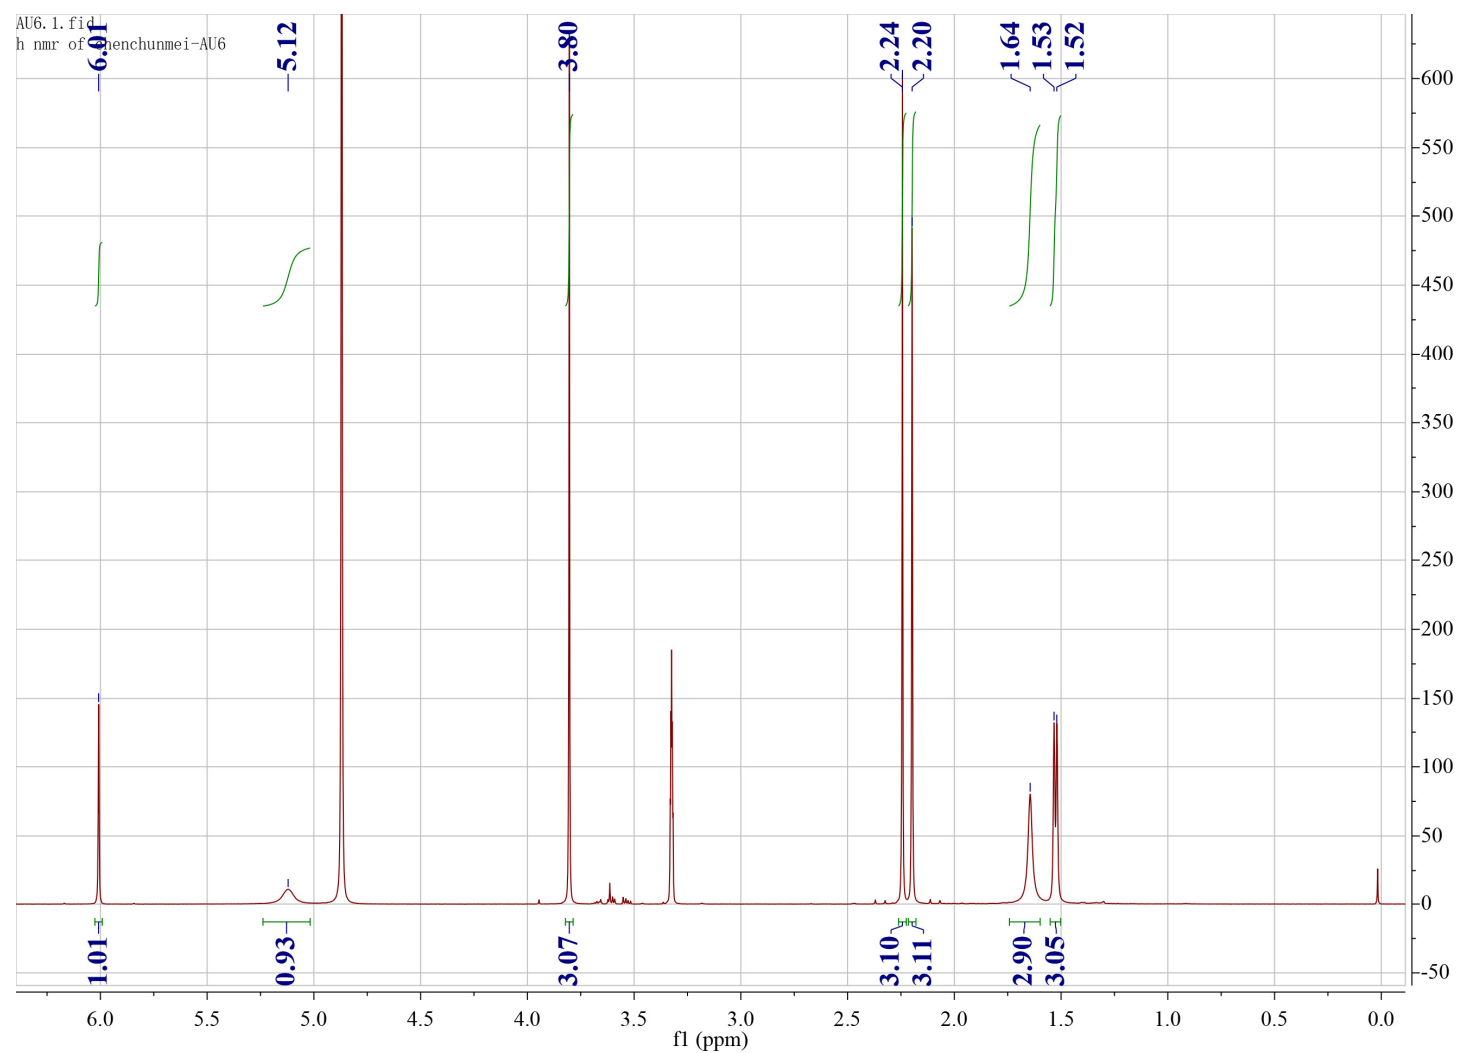

**Figure S1.**  $^1\text{H}$  NMR spectrum of Aspergillusether J (**1**) (methanol- $d_4$ , 500 MHz)

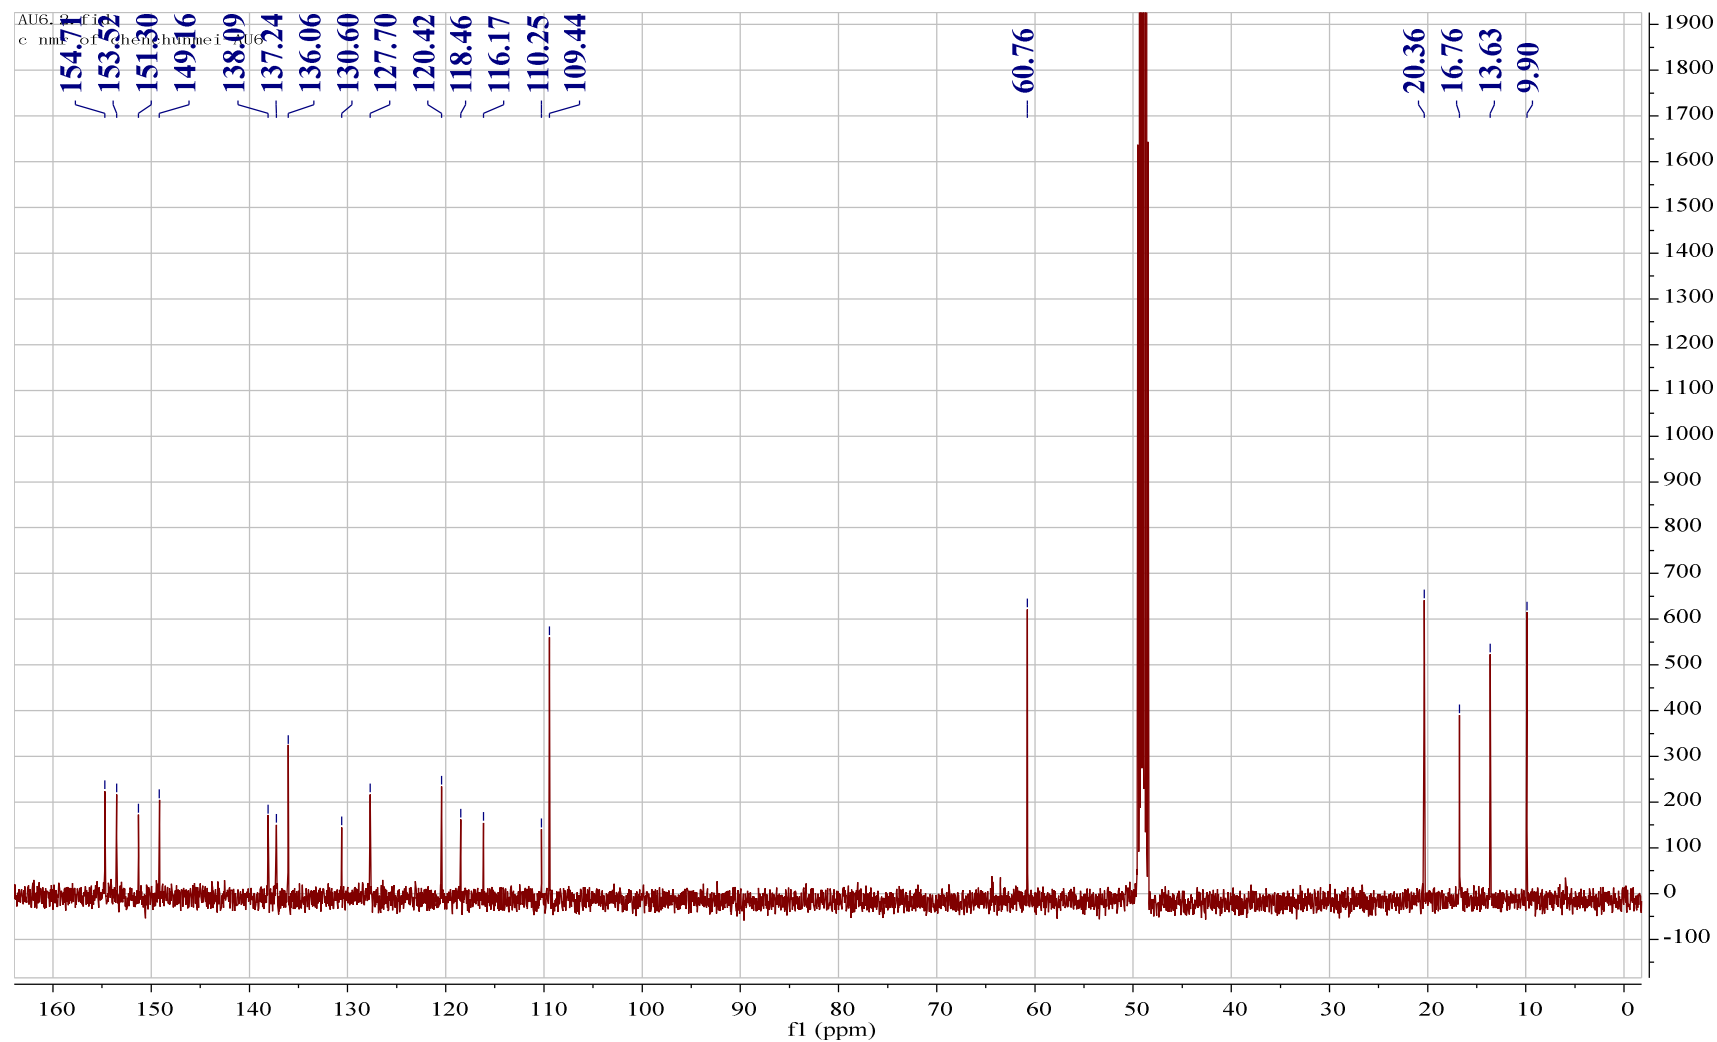

**Figure S2.**  $^{13}\text{C}$  NMR spectrum of Aspergillus ether J (**1**) (methanol- $d_4$ , 125 MHz)

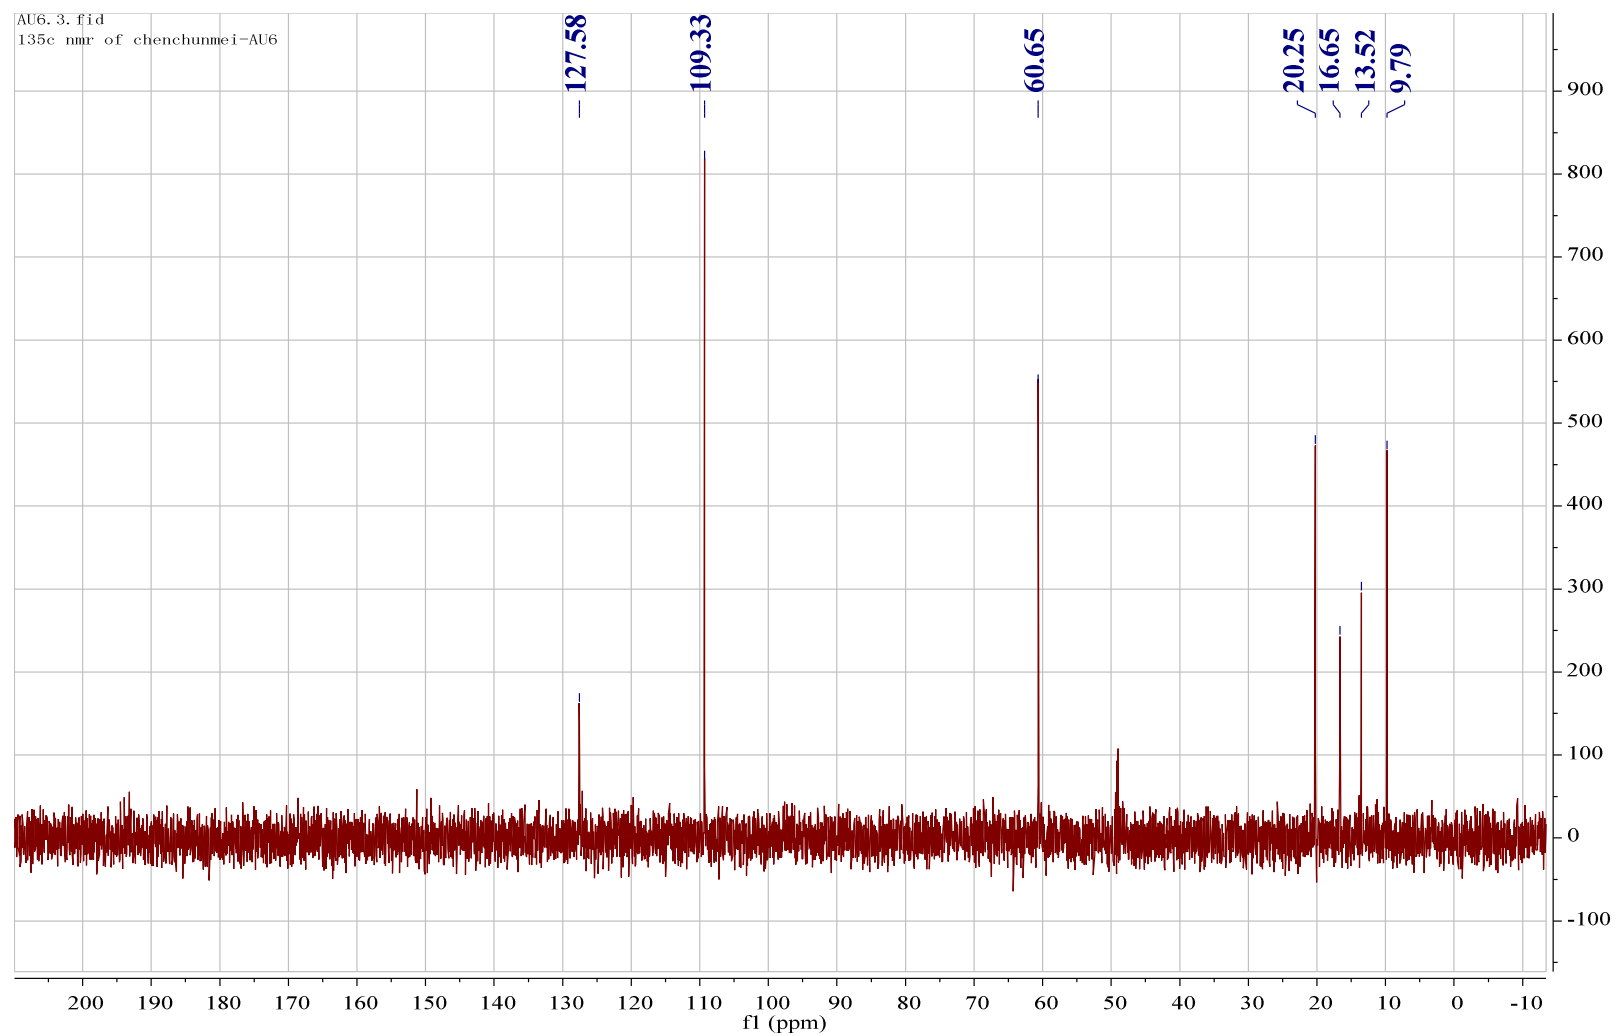

**Figure S3.** DEPT 135 NMR spectrum of Aspergillus ether J (1) (methanol- $d_4$ , 125 MHz)

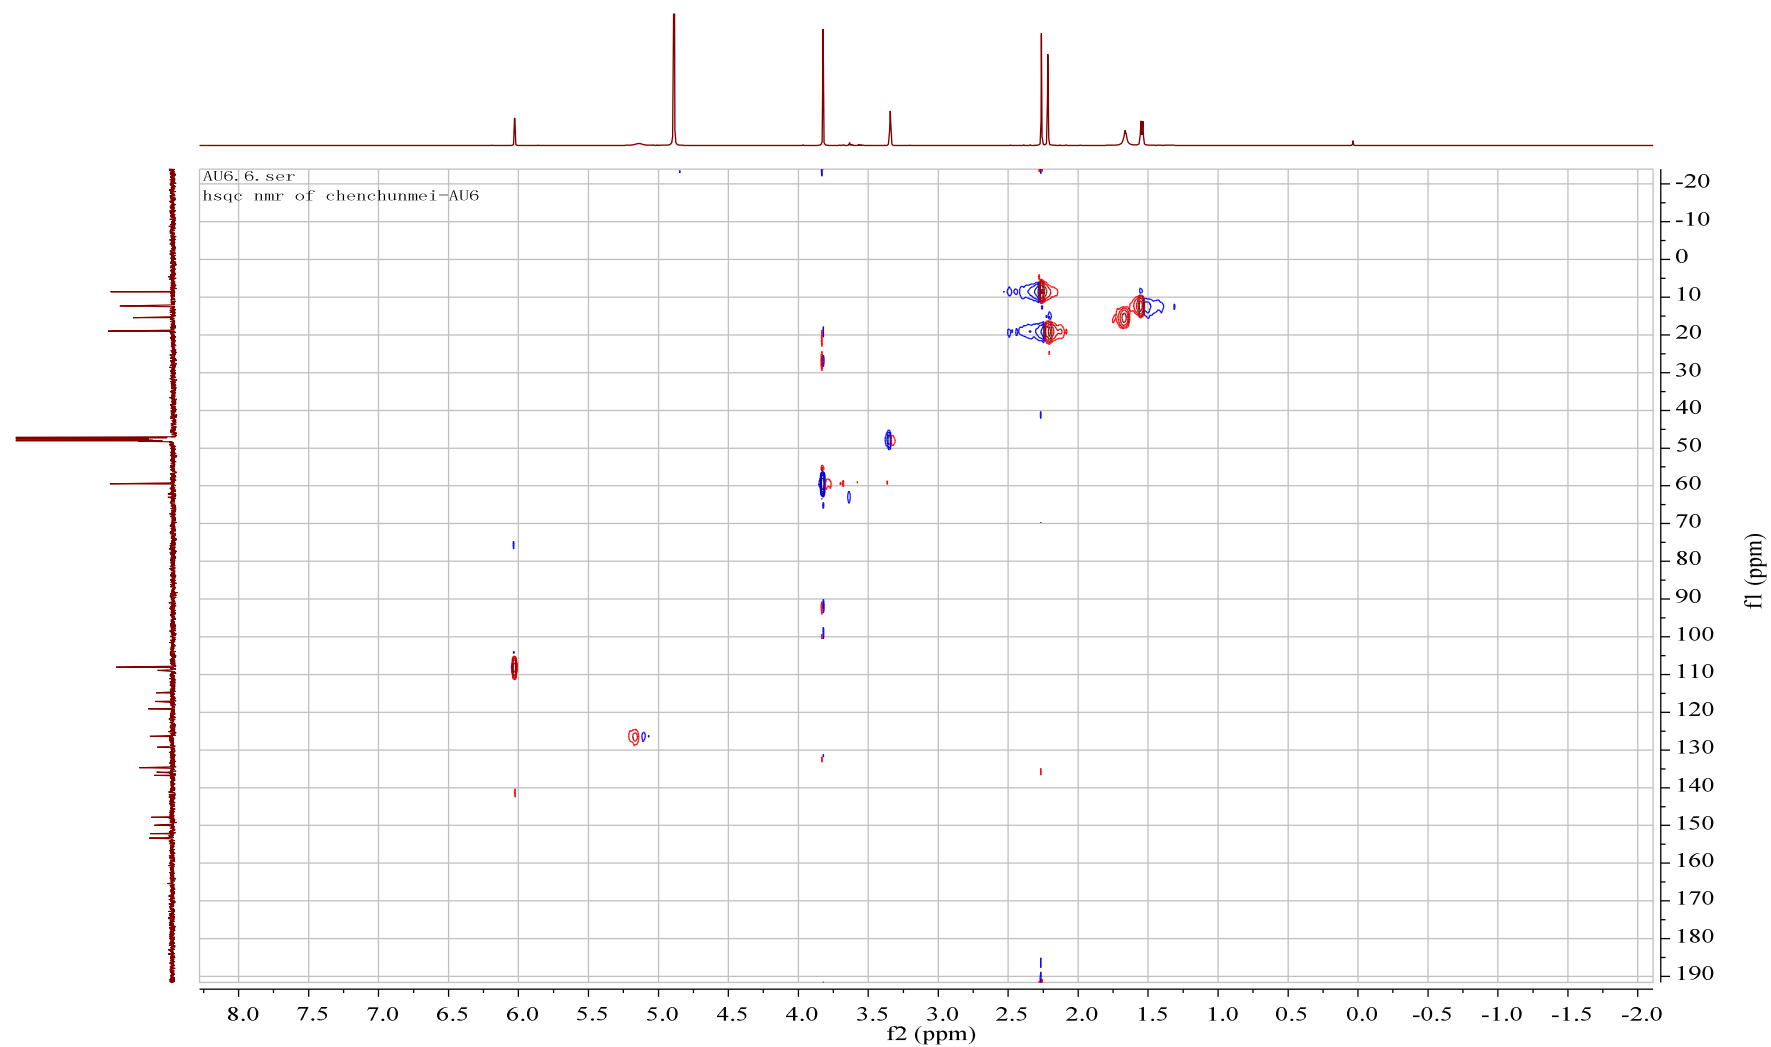

**Figure S4.** HSQC spectrum of Aspergillus ether J (**1**) (methanol- $d_4$ )

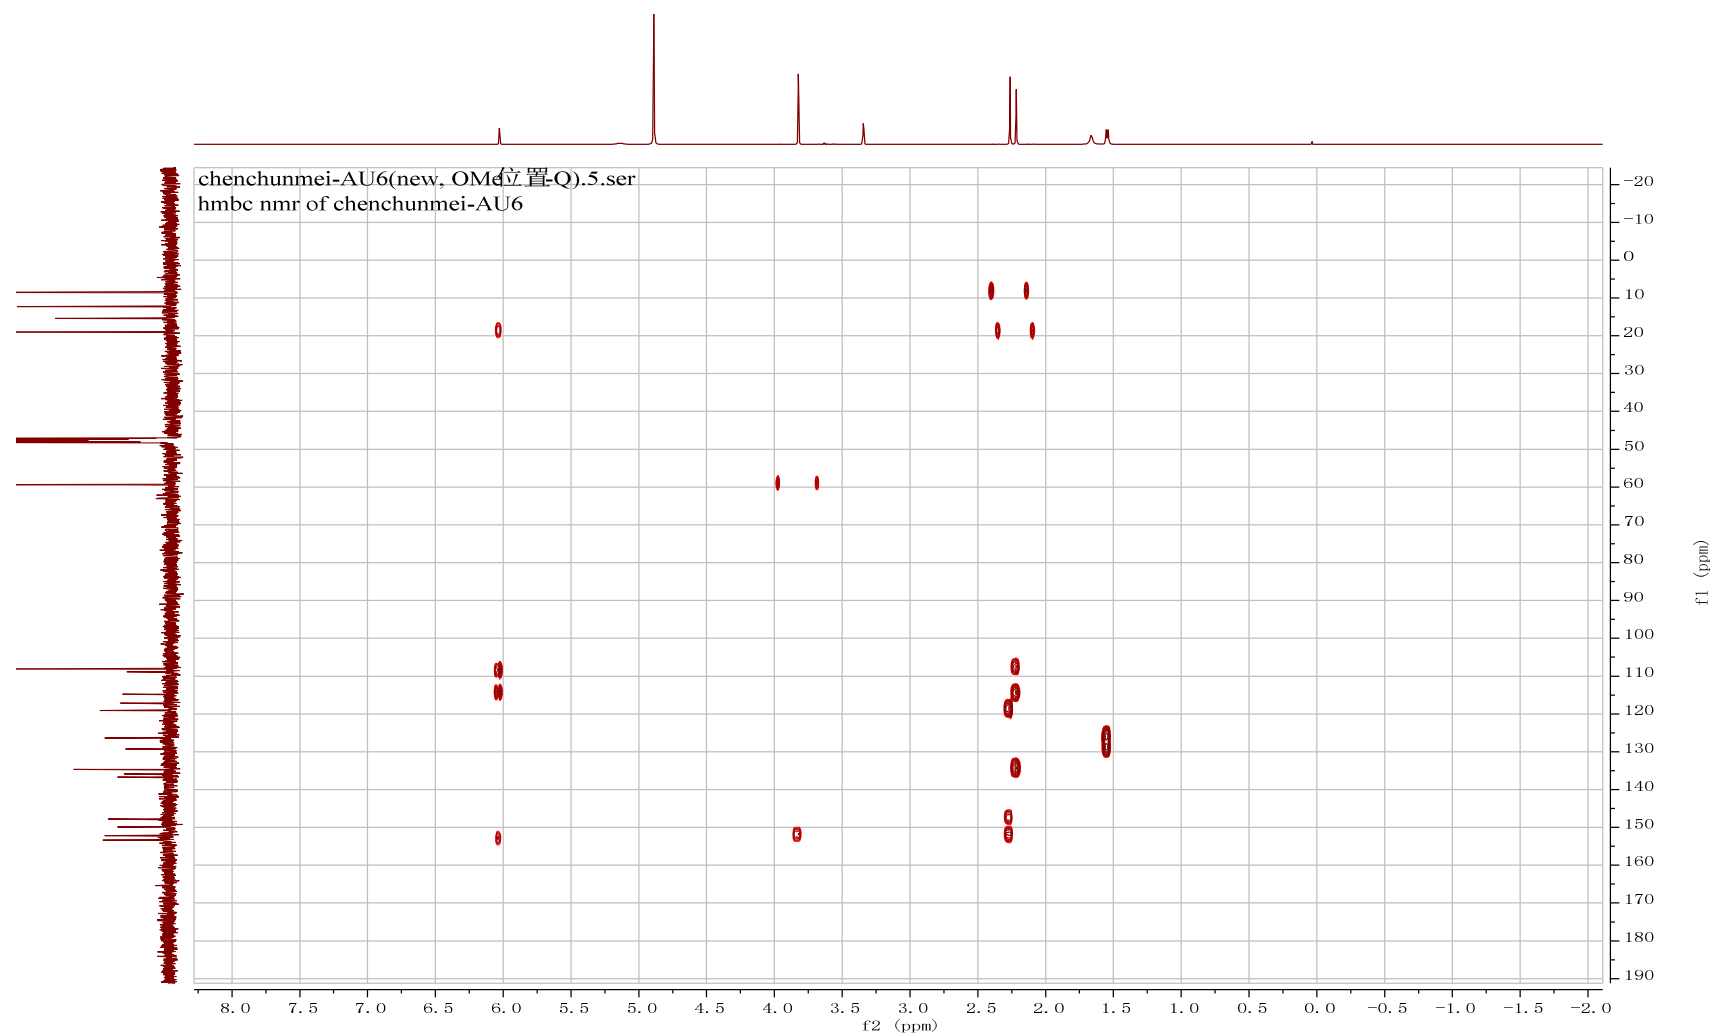

**Figure S5.** HMBC spectrum of Aspergillusether J (**1**) (methanol-*d*<sub>4</sub>)

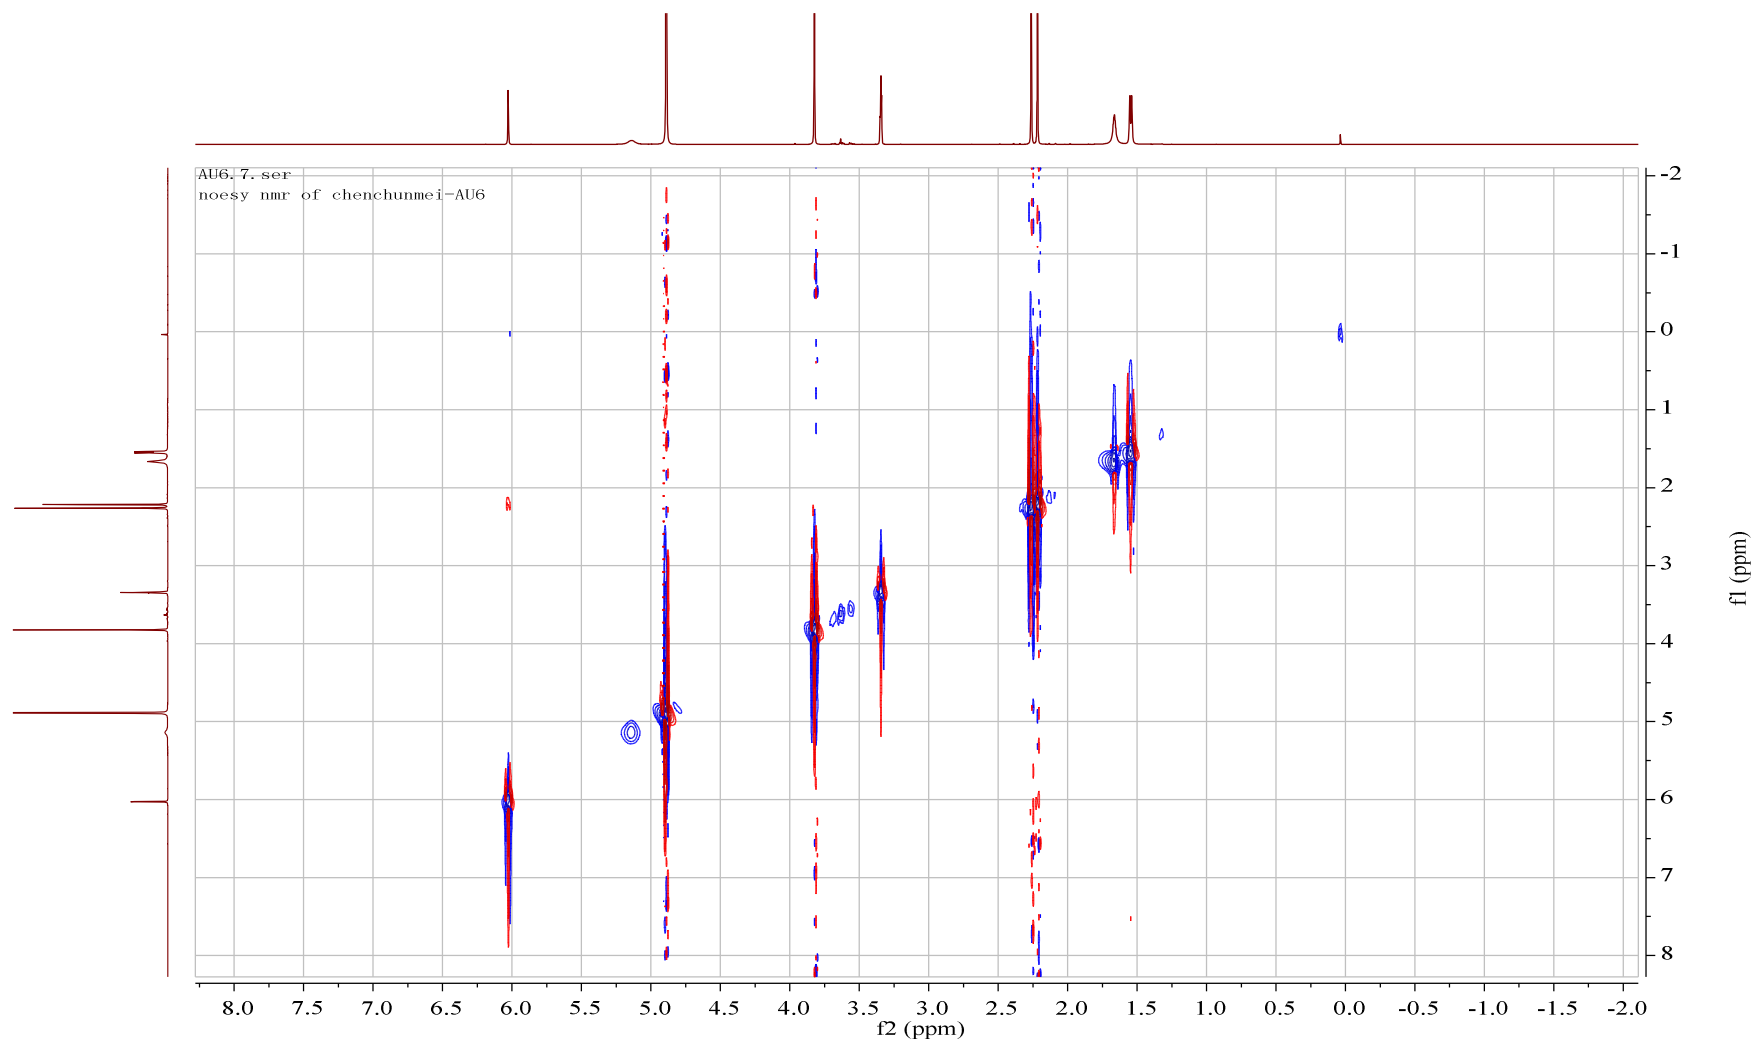

**Figure S6.** NOESY spectrum of Aspergillus ether J (1) (methanol- $d_4$ ).



## Mass Spectrum SmartFormula Report

|                      |                                                          |                  |  |                      |  |
|----------------------|----------------------------------------------------------|------------------|--|----------------------|--|
| <b>Analysis Info</b> |                                                          | Acquisition Date |  | 5/28/2021 5:29:30 PM |  |
| Analysis Name        | D:\Data\MS\data\202105\chenchunmei_AU6_neg_11_01_10842.d |                  |  |                      |  |
| Method               | LC_Direct Infusion_neg_70-500mz.m                        |                  |  |                      |  |
| Sample Name          | chenchunmei_AU6_neg                                      |                  |  |                      |  |
| Comment              |                                                          |                  |  |                      |  |
| Operator             |                                                          | SCSIO            |  |                      |  |
| Instrument           |                                                          | maXis            |  | 255552.00029         |  |

|                              |          |                      |          |                  |           |
|------------------------------|----------|----------------------|----------|------------------|-----------|
| <b>Acquisition Parameter</b> |          |                      |          |                  |           |
| Source Type                  | ESI      | Ion Polarity         | Negative | Set Nebulizer    | 0.4 Bar   |
| Focus                        | Active   | Set Capillary        | 4000 V   | Set Dry Heater   | 180 °C    |
| Scan Begin                   | 100 m/z  | Set End Plate Offset | -500 V   | Set Dry Gas      | 4.0 l/min |
| Scan End                     | 1500 m/z | Set Charging Voltage | 0 V      | Set Divert Valve | Waste     |
|                              |          | Set Corona           | 0 nA     | Set APCI Heater  | 0 °C      |

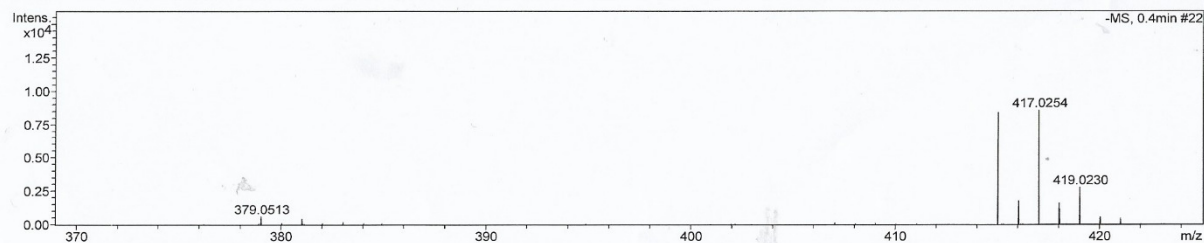

| Meas. m/z | # | Ion Formula | Score  | m/z      | err [ppm] | err [mDa] | mSigma | rdB  | e <sup>-</sup> Conf | N-Rule |
|-----------|---|-------------|--------|----------|-----------|-----------|--------|------|---------------------|--------|
| 379.0513  | 1 | C19H17ClO4  | 100.00 | 379.0509 | 0.9       | 0.4       | 40.4   | 10.5 | even                | ok     |
| 415.0285  | 1 | C19H18ClO4  | 100.00 | 415.0276 | -2.0      | -0.8      | 12.2   | 9.5  | even                | ok     |

chenchunmei\_AU6\_neg\_11\_01\_10842.d  
Bruker Compass DataAnalysis 4.1

printed: 5/28/2021 5:33:45 PM

by: SCSIO

Page 1 of 1

**Figure S7.** HRESIMS spectrum of Aspergillusether J (1).

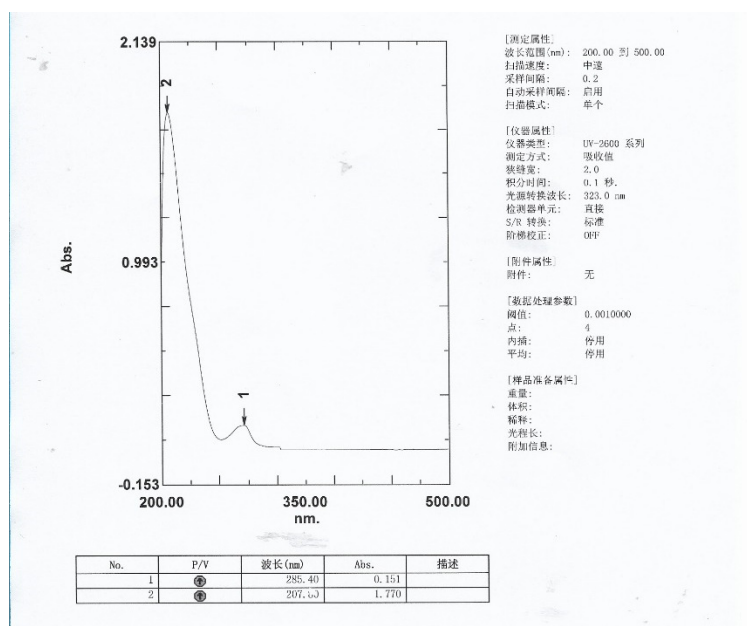

Figure S8. UV spectrum of Aspergillusether J (1).

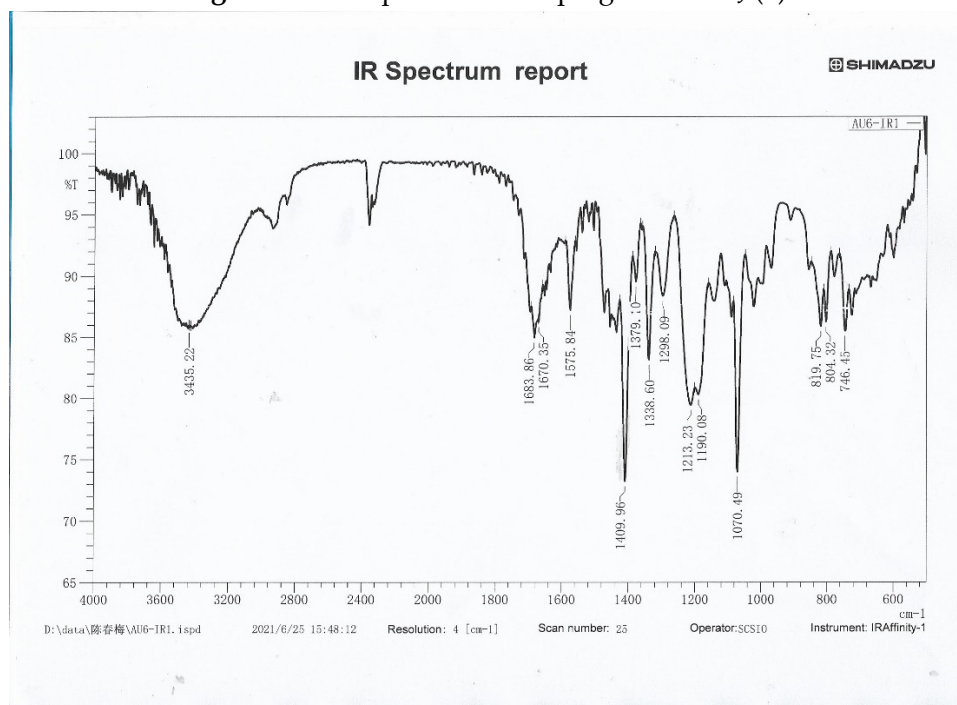

Figure S9. IR spectrum of Aspergillusether J (1)

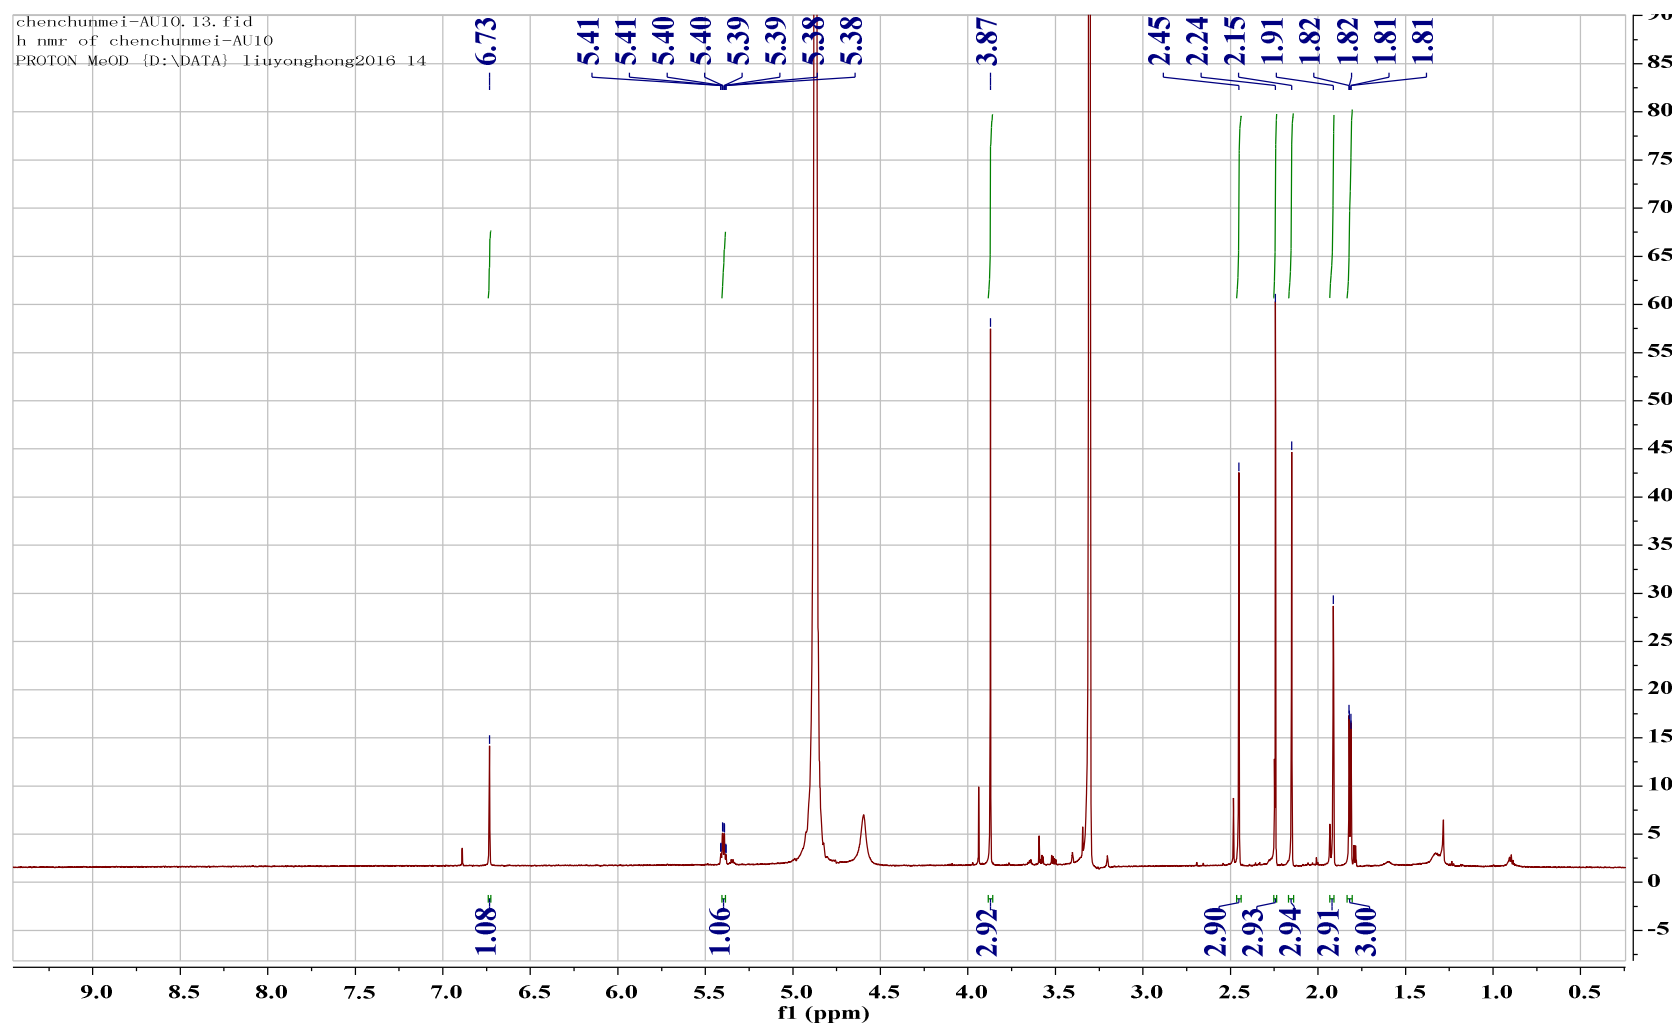

**Figure S10.**  $^1\text{H}$  NMR spectrum of Aspergillusidone H (3) (methanol- $d_4$ , 700 MHz)

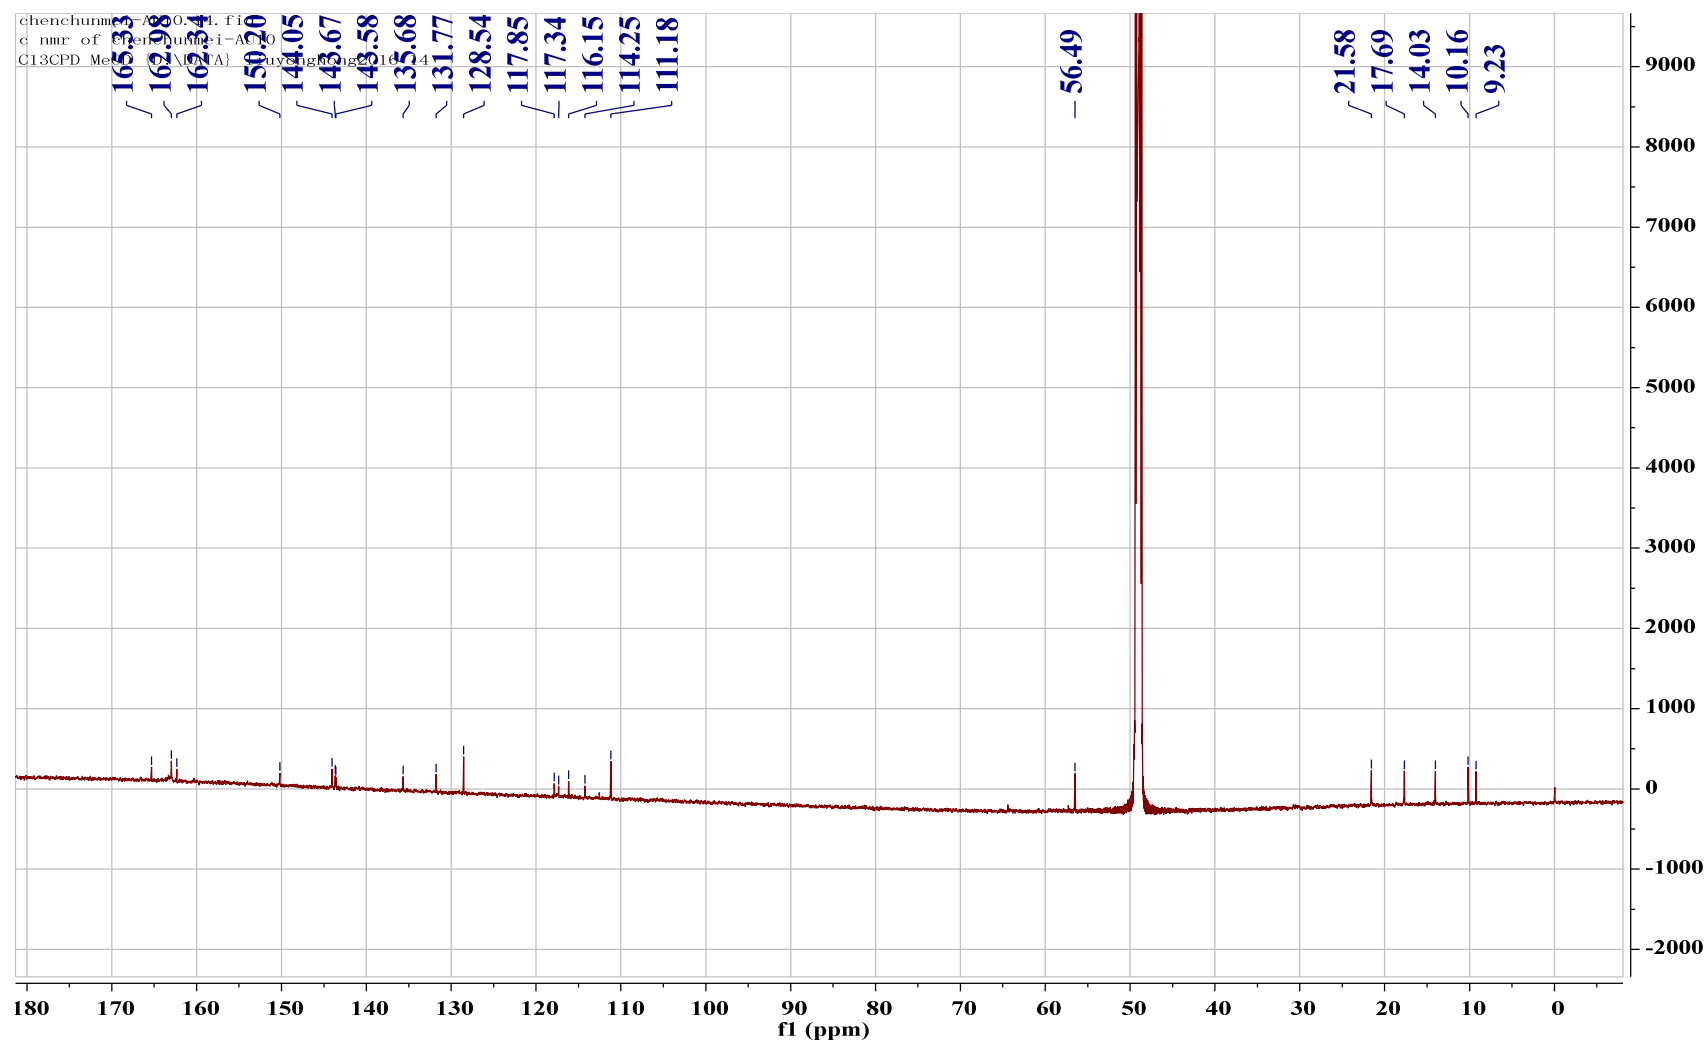

**Figure S11.**  $^{13}\text{C}$  NMR spectrum of Aspergillusidone H (**3**) (methanol- $d_4$ , 175 MHz)

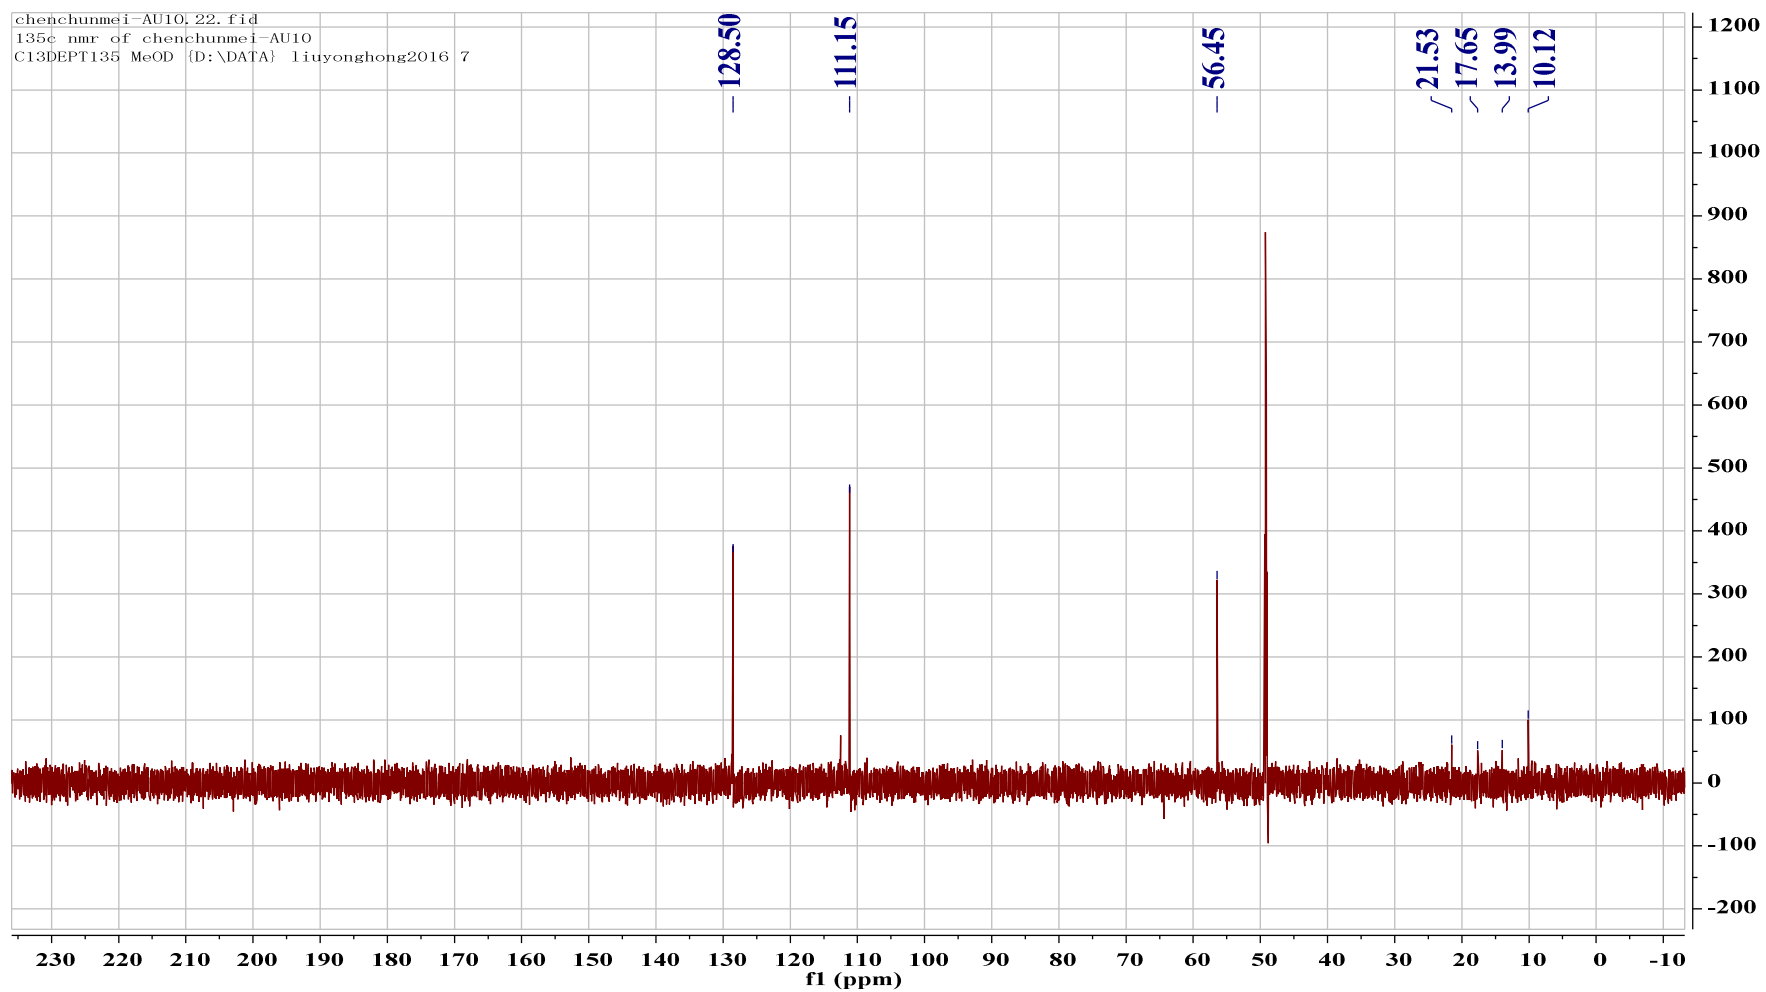

Figure S12. DEPT 135 NMR spectrum of Aspergillusidone H (3) (methanol- $d_4$ , 175 MHz)

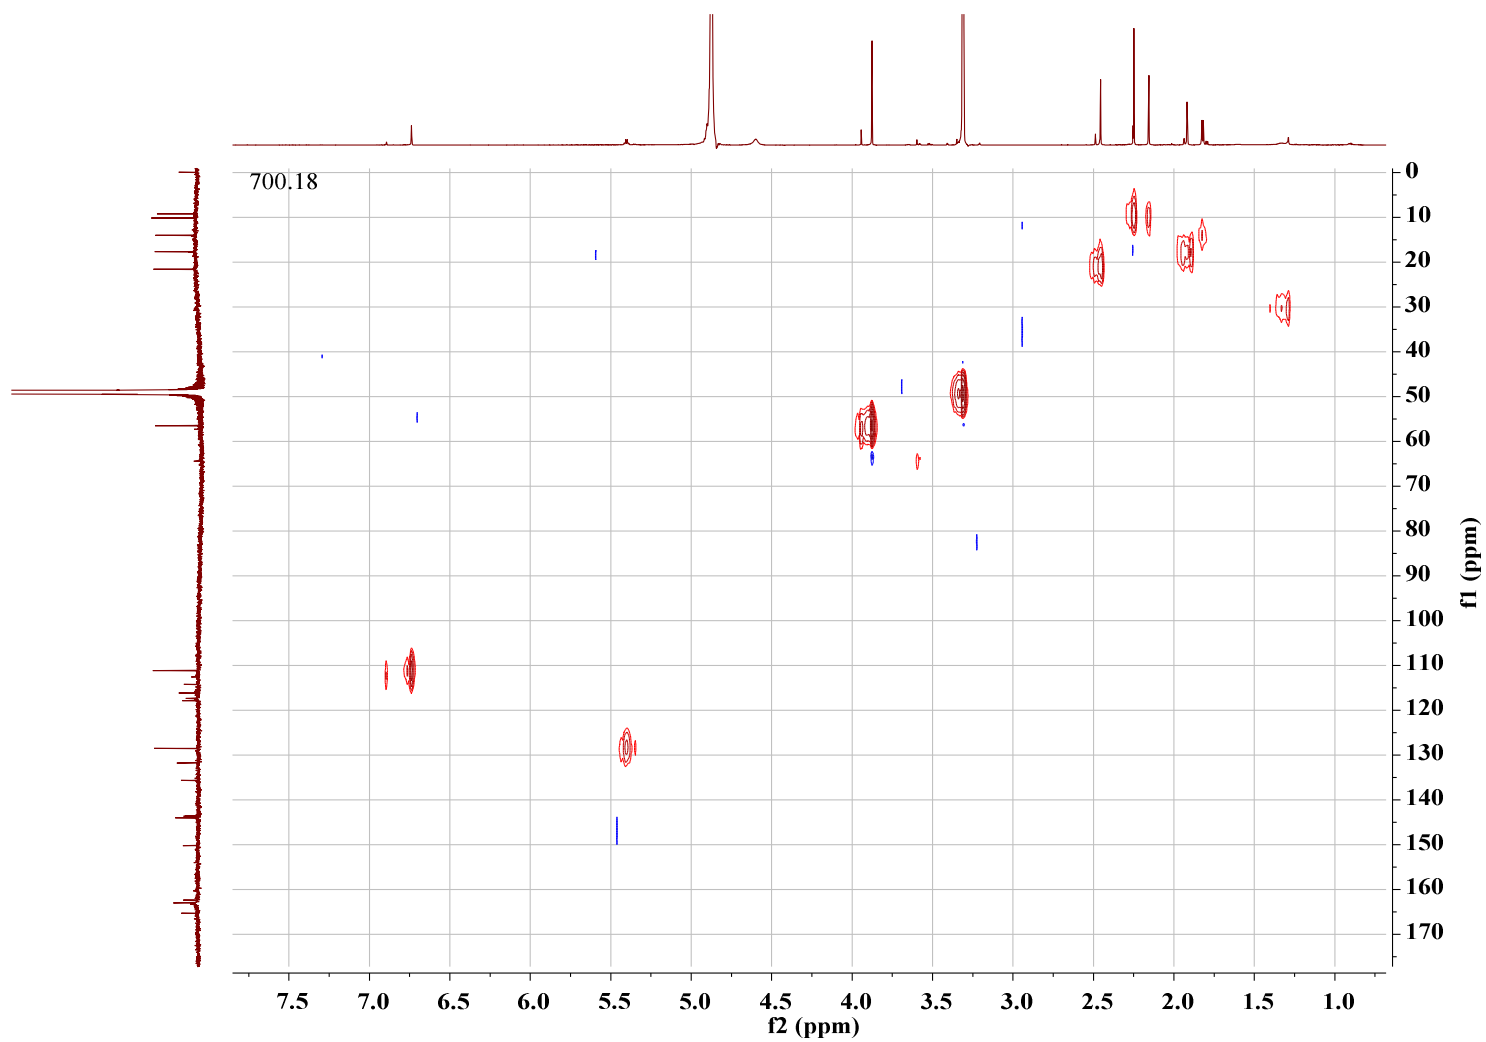

**Figure S13.** HSQC spectrum of Aspergillusidone H (3) (methanol- $d_4$ )

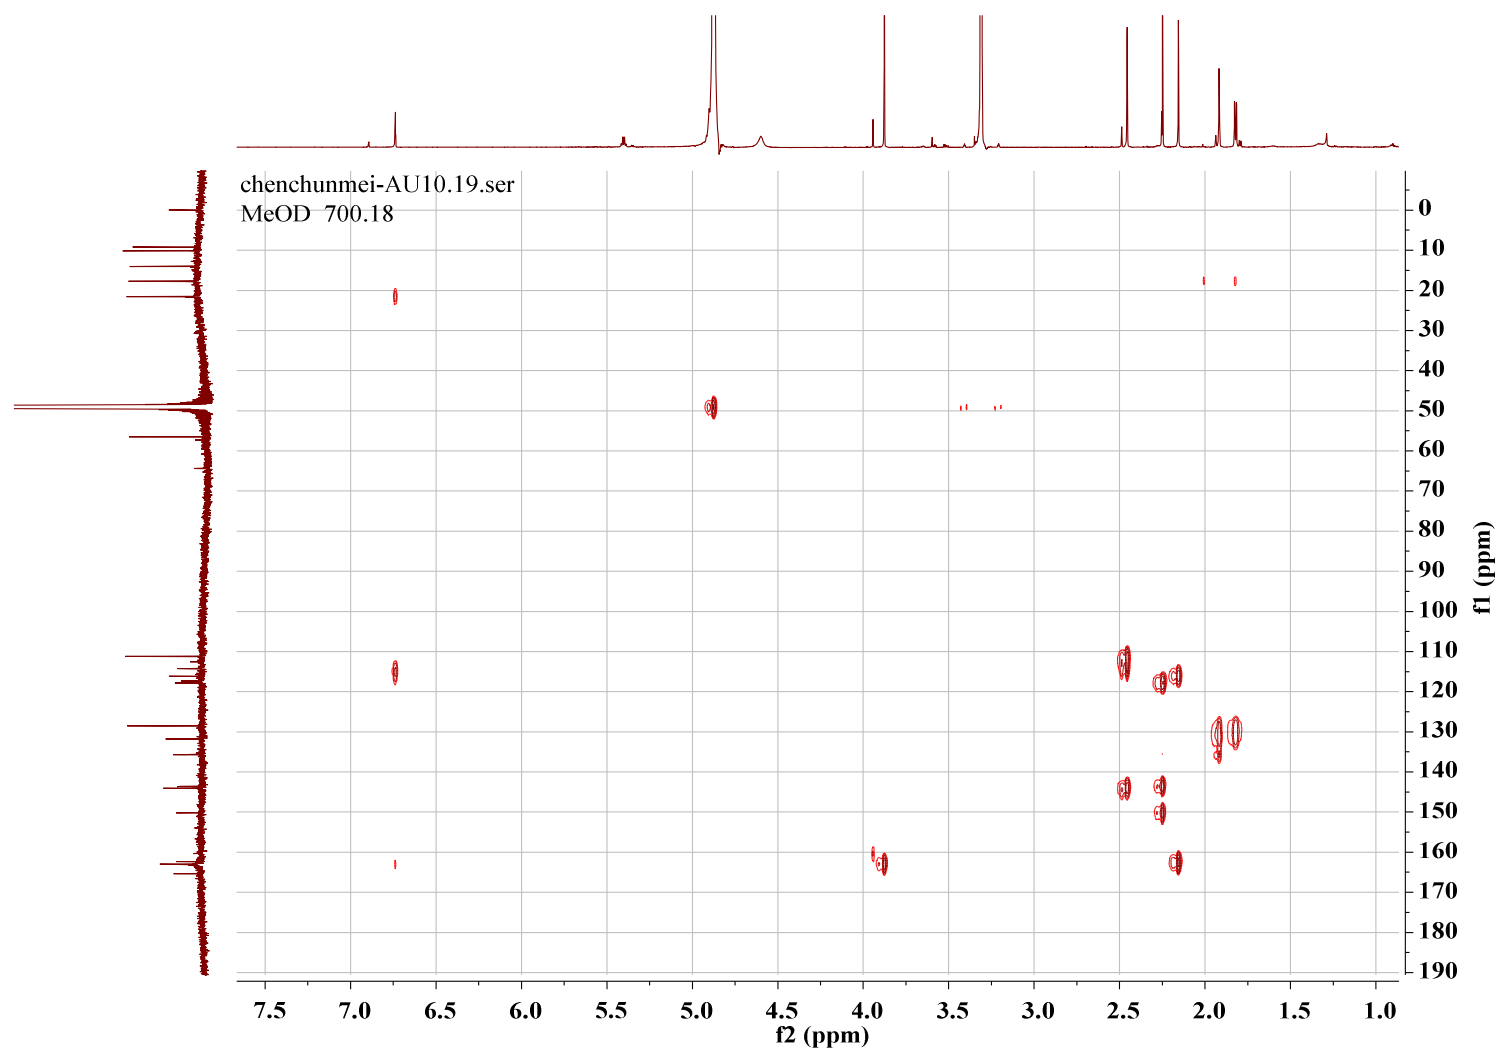

**Figure S14.** HMBC spectrum of Aspergillusidone H (3) (methanol- $d_4$ )

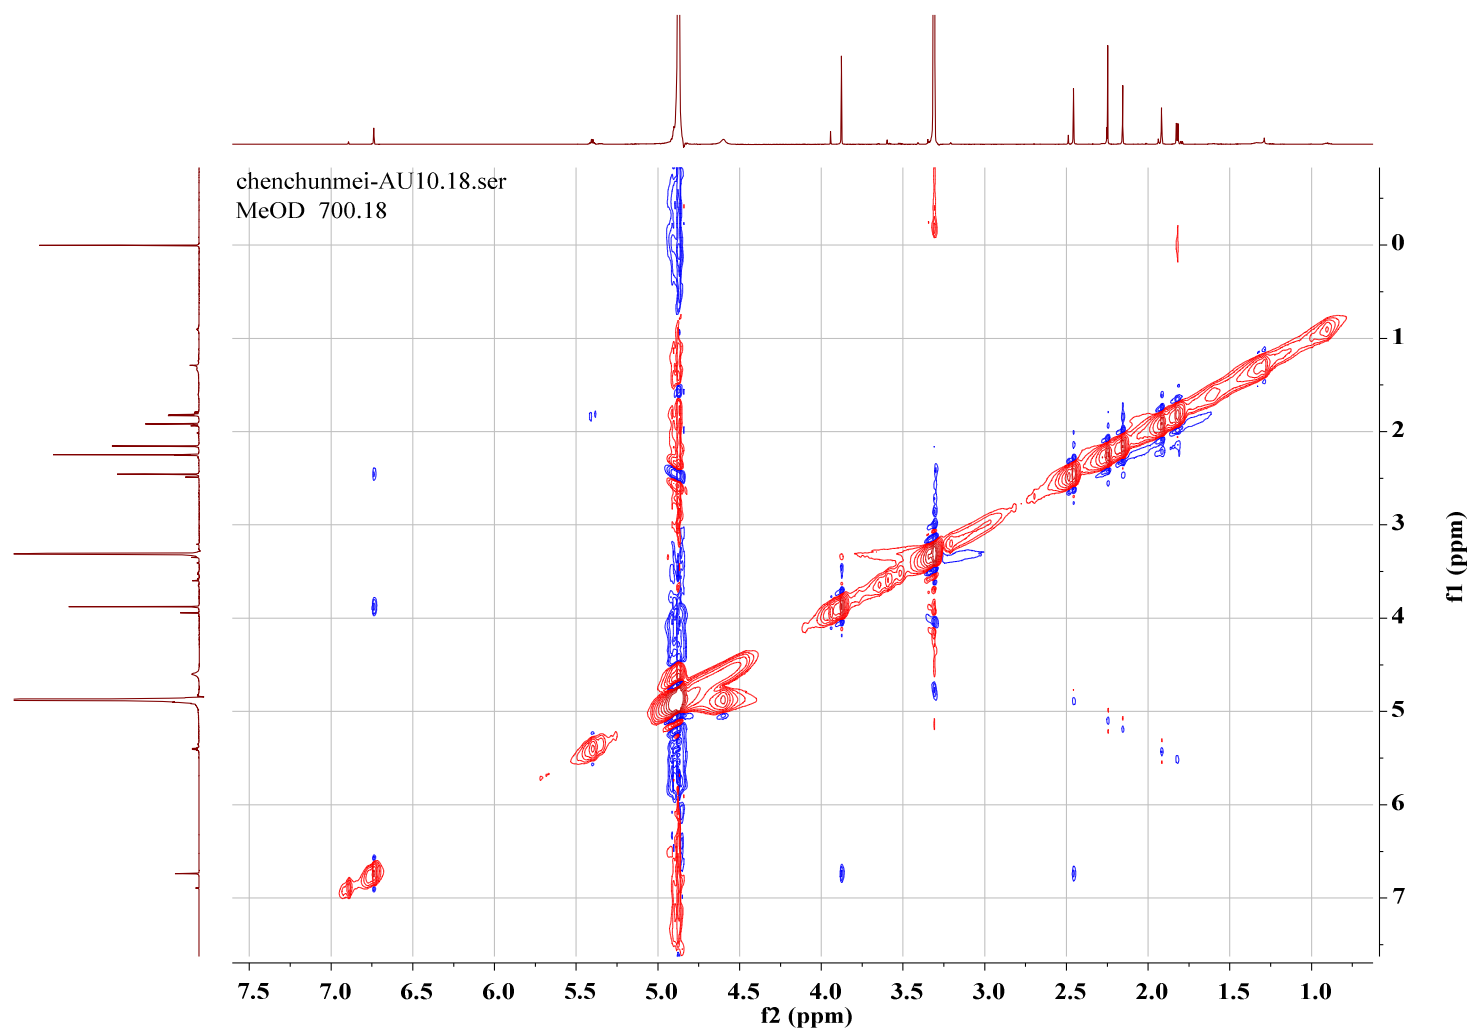

**Figure S15.** NOESY spectrum of Aspergillusidone H (**3**) (methanol- $d_4$ )



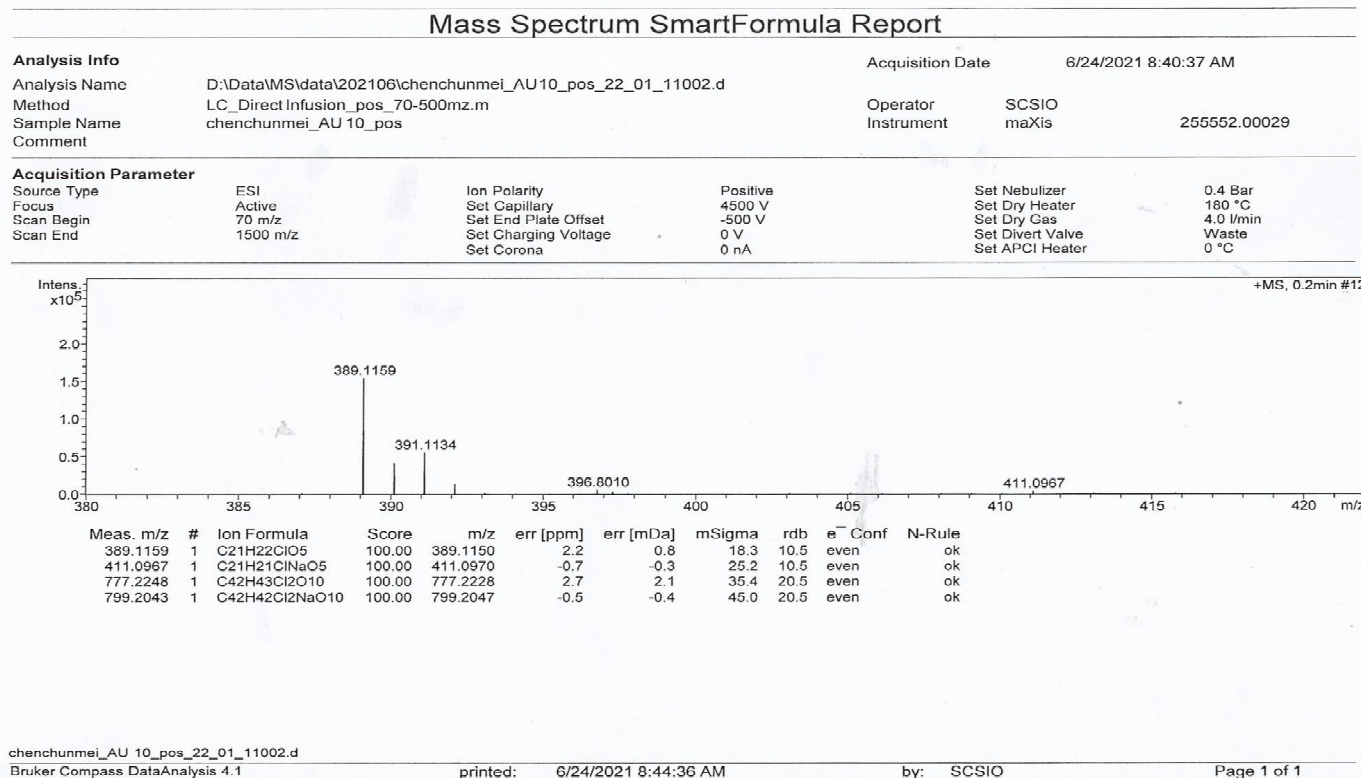

**Figure S16.** HRESIMS spectrum of Aspergillusidone H (3)

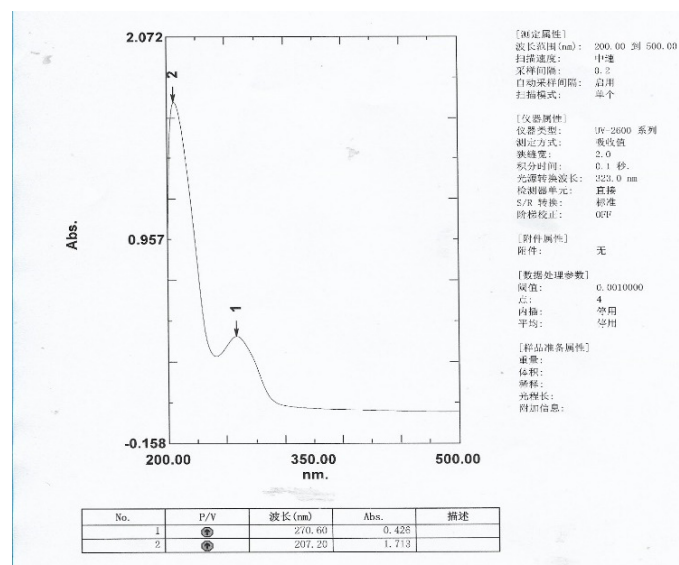

Figure S17. UV spectrum of Aspergillusidone H (3)

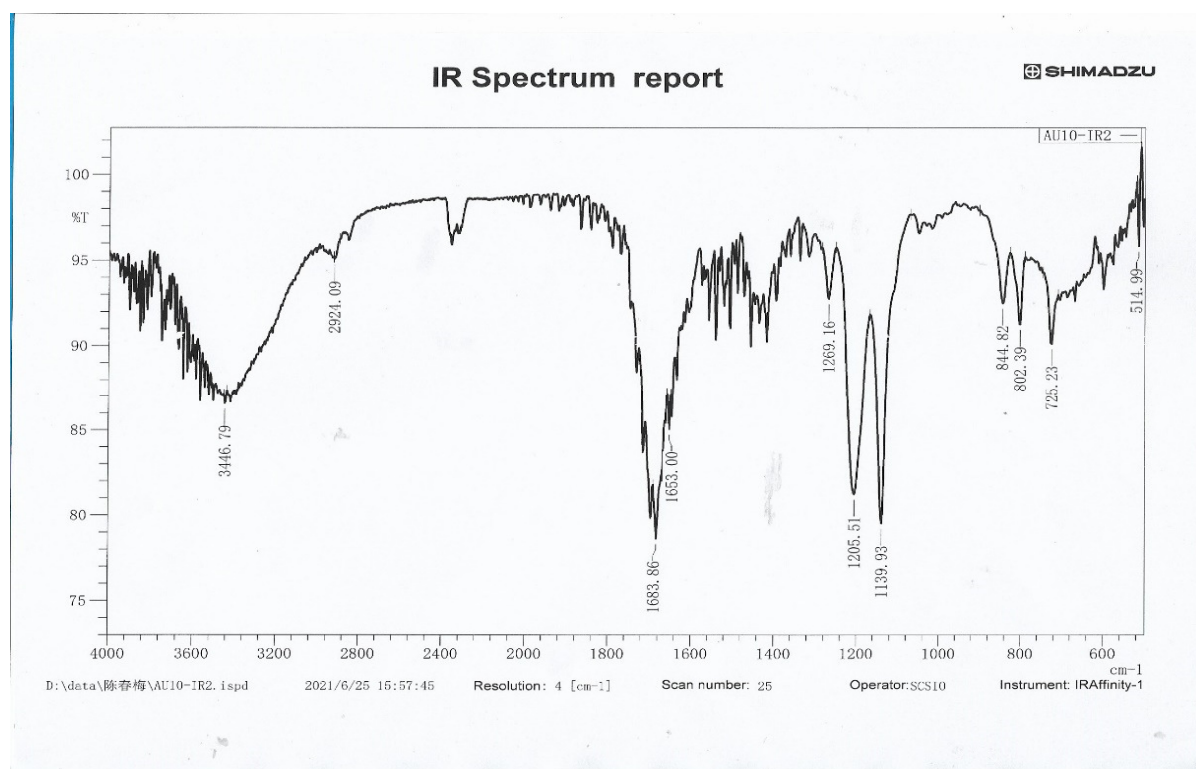

Figure S18. IR spectrum of Aspergillusidone H (3)

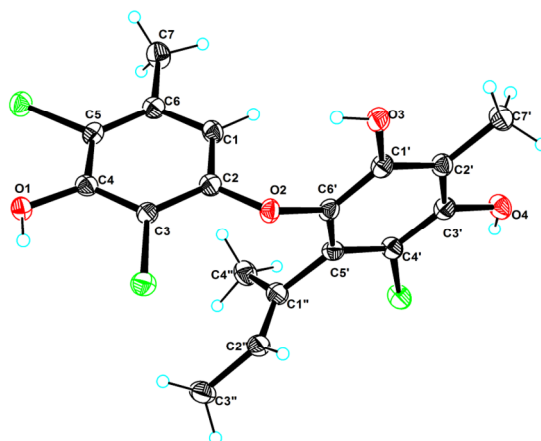

**Figure S19.** X ray crystal structure of compound 2.

**Table S1.** Energies of **8** at MMFF94 force field.

| Configuration       | Conformer | Energy (kcal/mol) | Population (%) |
|---------------------|-----------|-------------------|----------------|
| <i>R</i> - <b>8</b> | 1         | 211.00            | 35.2           |
| <i>R</i> - <b>8</b> | 2         | 211.55            | 28.1           |
| <i>R</i> - <b>8</b> | 3         | 215.72            | 5.2            |
| <i>R</i> - <b>8</b> | 4         | 215.73            | 2.6            |
| <i>R</i> - <b>8</b> | 5         | 216.19            | 4.3            |
| <i>R</i> - <b>8</b> | 6         | 216.30            | 4.1            |
| <i>R</i> - <b>8</b> | 7         | 216.54            | 3.8            |
| <i>R</i> - <b>8</b> | 8         | 216.74            | 3.5            |
| <i>R</i> - <b>8</b> | 9         | 217.09            | 1.5            |
| <i>R</i> - <b>8</b> | 10        | 217.86            | 2.2            |
| <i>R</i> - <b>8</b> | 11        | 218.42            | 0.9            |
| <i>R</i> - <b>8</b> | 12        | 218.83            | 1.5            |
| <i>R</i> - <b>8</b> | 13        | 218.94            | 1.4            |
| <i>R</i> - <b>8</b> | 14        | 218.96            | 0.7            |
| <i>R</i> - <b>8</b> | 15        | 219.38            | 1.2            |
| <i>R</i> - <b>8</b> | 16        | 219.44            | 0.6            |
| <i>R</i> - <b>8</b> | 17        | 219.56            | 1.1            |
| <i>S</i> - <b>8</b> | 1         | 211.00            | 17.0           |
| <i>S</i> - <b>8</b> | 2         | 211.55            | 27.1           |
| <i>S</i> - <b>8</b> | 3         | 213.72            | 11.3           |
| <i>S</i> - <b>8</b> | 4         | 214.33            | 8.9            |
| <i>S</i> - <b>8</b> | 5         | 215.16            | 6.3            |
| <i>S</i> - <b>8</b> | 6         | 215.73            | 5.0            |
| <i>S</i> - <b>8</b> | 7         | 216.19            | 4.2            |
| <i>S</i> - <b>8</b> | 8         | 216.30            | 2              |
| <i>S</i> - <b>8</b> | 9         | 216.54            | 3.6            |

|             |    |        |     |
|-------------|----|--------|-----|
| <i>S</i> -8 | 10 | 216.74 | 1.7 |
| <i>S</i> -8 | 11 | 217.09 | 2.9 |
| <i>S</i> -8 | 12 | 217.86 | 2.1 |
| <i>S</i> -8 | 13 | 218.42 | 1.7 |
| <i>S</i> -8 | 14 | 218.96 | 1.4 |
| <i>S</i> -8 | 15 | 219.44 | 1.1 |
| <i>S</i> -8 | 16 | 219.56 | 0.5 |
| <i>S</i> -8 | 17 | 219.57 | 1.1 |

**Table S2.** Energies of **8** at B3LYP/6–31+g(d) level in methanol.

| Configuration | Conformer | E (Hartree)  | E (kcal/mol)      | Population (%) |
|---------------|-----------|--------------|-------------------|----------------|
| <i>R</i> -8   | 1         | –846.6892129 | –531305.947986879 | 11.34          |
| <i>R</i> -8   | 2         | –846.6893122 | –531306.010298622 | 12.60          |
| <i>R</i> -8   | 3         | –846.6883416 | –531305.401237416 | 4.50           |
| <i>R</i> -8   | 4         | –846.6888889 | –531305.744673639 | 8.05           |
| <i>R</i> -8   | 5         | –846.6877075 | –531305.003333325 | 2.30           |
| <i>R</i> -8   | 6         | –846.6884325 | –531305.458278075 | 4.96           |
| <i>R</i> -8   | 7         | –846.6893129 | –531306.010737879 | 12.61          |
| <i>R</i> -8   | 8         | –846.6877371 | –531305.021907621 | 2.37           |
| <i>R</i> -8   | 9         | –846.6892137 | –531305.948488887 | 11.35          |
| <i>R</i> -8   | 10        | –846.6877379 | –531305.022409629 | 2.38           |
| <i>R</i> -8   | 11        | –846.6877075 | –531305.003333325 | 2.30           |
| <i>R</i> -8   | 12        | –846.6888885 | –531305.744422635 | 8.04           |
| <i>R</i> -8   | 13        | –846.6877078 | –531305.003521578 | 2.30           |
| <i>R</i> -8   | 14        | –846.685133  | –531303.38780883  | 0.15           |
| <i>R</i> -8   | 15        | –846.688809  | –531305.69453559  | 7.39           |
| <i>R</i> -8   | 16        | –846.6884321 | –531305.458027071 | 4.96           |
| <i>R</i> -8   | 17        | –846.6877383 | –531305.022660633 | 2.38           |
| <i>S</i> -8   | 1         | –846.6892128 | –531305.947924128 | 10.38          |
| <i>S</i> -8   | 2         | –846.6893122 | –531306.010298622 | 11.53          |
| <i>S</i> -8   | 3         | –846.6893125 | –531306.010486875 | 11.54          |
| <i>S</i> -8   | 4         | –846.6892129 | –531305.947986879 | 10.38          |
| <i>S</i> -8   | 5         | –846.6888093 | –531305.694723843 | 6.77           |
| <i>S</i> -8   | 6         | –846.6888889 | –531305.744673639 | 7.36           |
| <i>S</i> -8   | 7         | –846.6877076 | –531305.003396076 | 2.10           |
| <i>S</i> -8   | 8         | –846.6884326 | –531305.458340826 | 4.54           |
| <i>S</i> -8   | 9         | –846.6893129 | –531306.010737879 | 11.54          |
| <i>S</i> -8   | 10        | –846.6877371 | –531305.021907621 | 2.17           |
| <i>S</i> -8   | 11        | –846.6892141 | –531305.948739891 | 10.39          |
| <i>S</i> -8   | 12        | –846.6877379 | –531305.022409629 | 2.17           |
| <i>S</i> -8   | 13        | –846.6877074 | –531305.003270574 | 2.10           |
| <i>S</i> -8   | 14        | –846.6851341 | –531303.388499091 | 0.14           |
| <i>S</i> -8   | 15        | –846.6884317 | –531305.457776067 | 4.54           |

|             |    |              |                   |      |
|-------------|----|--------------|-------------------|------|
| <i>S</i> -8 | 16 | −846.687738  | −531305.02247238  | 2.17 |
| <i>S</i> -8 | 17 | −846.6852468 | −531303.459219468 | 0.15 |

*R*-8

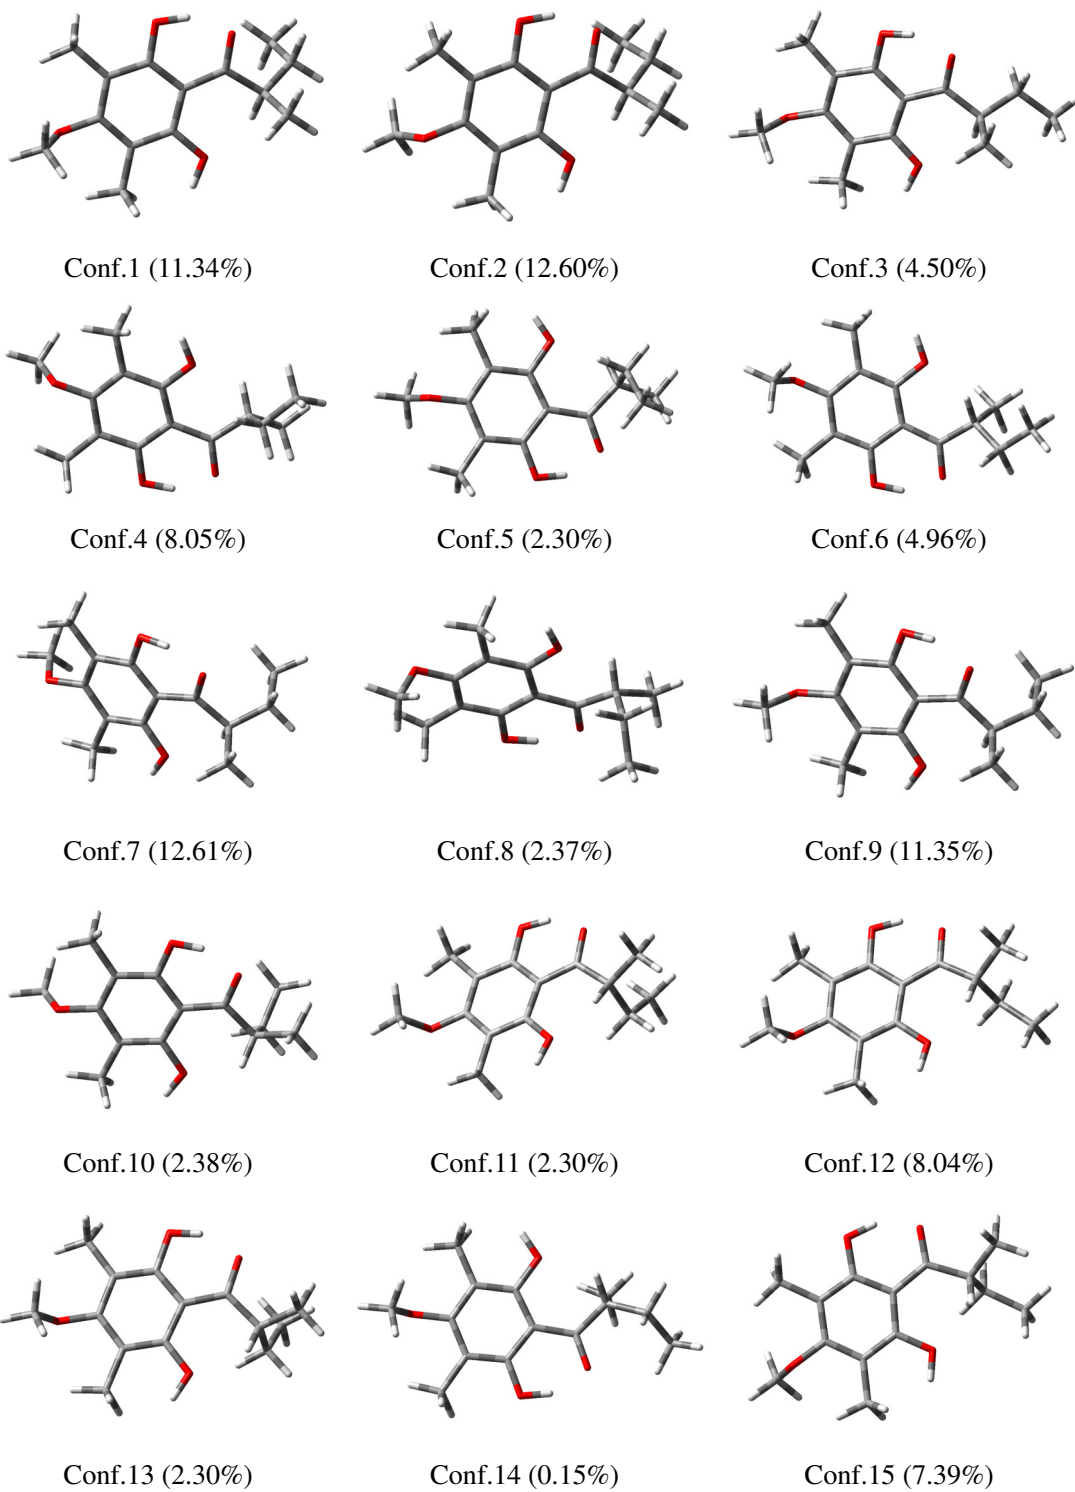

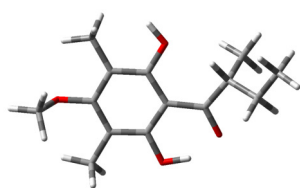

Conf.16 (4.96%)

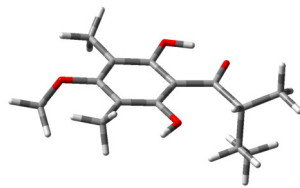

Conf.17 (2.38%)

S-8

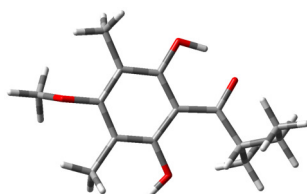

Conf.1 (10.38%)

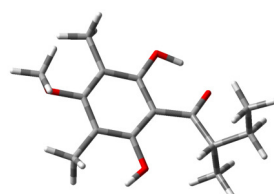

Conf.2 (11.53%)

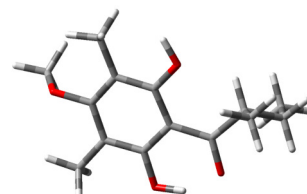

Conf.3 (11.54%)

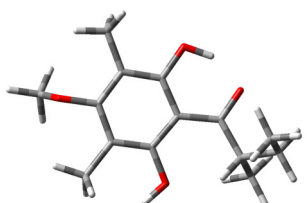

Conf.4 (10.38%)

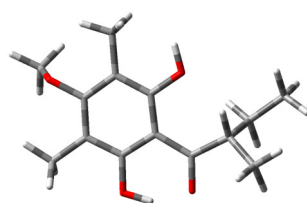

Conf.5 (6.77%)

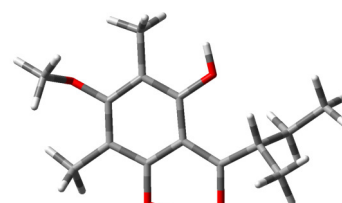

Conf.6 (7.36%)

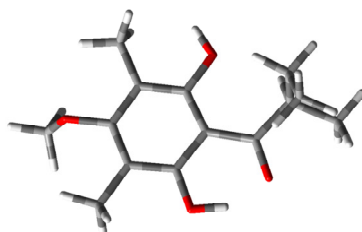

Conf.7 (2.10%)

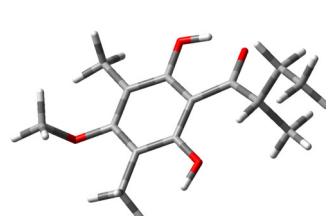

Conf.8 (4.54%)

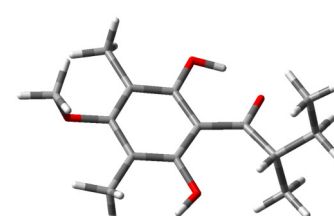

Conf.9 (11.54%)

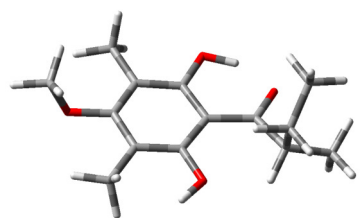

Conf.10 (2.17%)

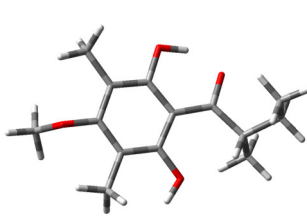

Conf.11 (10.39%)

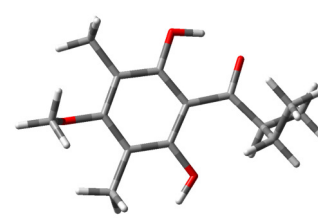

Conf.12 (2.17%)

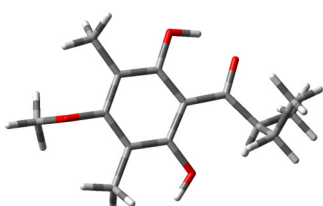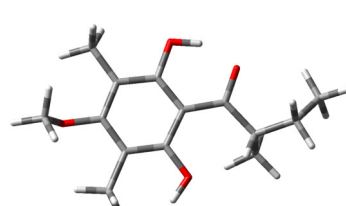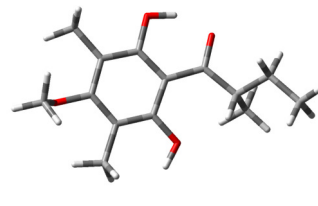

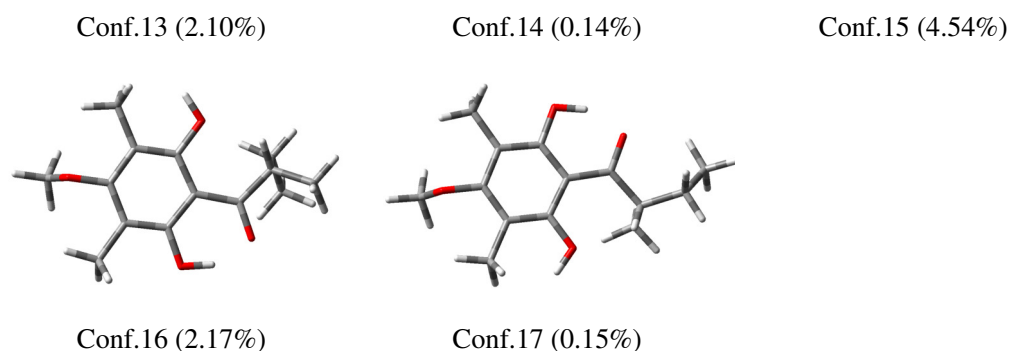

**Figure S20.** The optimized conformers and equilibrium populations of **8**.

Physicochemical data of known compounds **2**, **4–8**.

Aspergillusether J (**1**): white amorphous solid; UV (MeOH)  $\lambda_{\text{max}}$  (log $\epsilon$ ) 285 (2.40), 207 (3.47) nm; IR (film)  $\nu_{\text{max}}$  3435, 1683, 1575, 1409, 1338, 1213, 1190, 1070  $\text{cm}^{-1}$ ;  $^1\text{H}$  NMR (500 MHz, methanol- $d_4$ ):  $\delta_{\text{H}}$  6.01 (1H, s, H-1), 5.12 (1H, br s, H-2''), 3.80 (3H, s, 3'-OCH<sub>3</sub>), 2.24 (3H, s, 2'-CH<sub>3</sub>), 2.20 (3H, 6-CH<sub>3</sub>), 1.64 (3H, s, H<sub>3</sub>-4''), 1.52 (3H, d,  $J$  = 6.5 Hz, H<sub>3</sub>-3'');  $^{13}\text{C}$  NMR (125 MHz, methanol- $d_4$ )  $\delta_{\text{C}}$ : 154.7 (C, C-2), 153.5 (C, C-3'), 151.3 (C, C-4), 149.2 (C, C-1'), 138.1 (C, C-6'), 137.2 (C, C-5'), 136.1 (C, C-6), 130.6 (C, C-1''), 127.7 (CH, C-2''), 120.4 (C, C-2'), 118.5 (C, C-4'), 116.2 (C, C-5), 110.2 (C, C-3), 109.4 (CH, C-1), 60.8 (CH<sub>3</sub>, 3-OMe), 20.4 (CH<sub>3</sub>, 6-CH<sub>3</sub>), 16.8 (CH<sub>3</sub>, C-4''), 13.6 (CH<sub>3</sub>, C-3''), 9.9 (CH<sub>3</sub>, 2'-CH<sub>3</sub>). HR-ESIMS  $m/z$  417.0414 [ $\text{M} + \text{H}$ ]<sup>+</sup> (calcd for C<sub>19</sub>H<sub>20</sub>Cl<sub>3</sub>O<sub>4</sub>, 417.0427), 415.0285 [ $\text{M} - \text{H}$ ]<sup>-</sup> (calcd for C<sub>19</sub>H<sub>18</sub>Cl<sub>3</sub>O<sub>4</sub>, 415.0271).

Aspergillusether F (**2**): white needle crystals;  $^1\text{H}$  NMR (500 MHz, methanol- $d_4$ ):  $\delta_{\text{H}}$  6.00 (1H, s, H-1), 5.10 (1H, br s, H-2''), 2.18 (3H, s, 2'-CH<sub>3</sub>), 2.17 (3H, s, 6-CH<sub>3</sub>), 1.64 (3H, s, H<sub>3</sub>-4''), 1.51 (3H, d,  $J$  = 6.8 Hz, H<sub>3</sub>-3'');  $^{13}\text{C}$  NMR (125 MHz, methanol- $d_4$ )  $\delta_{\text{C}}$ : 155.1 (C, C-2), 151.2 (C, C-4), 150.1 (C, C-3'), 148.8 (C, C-1'), 136.1 (C, C-6), 136.0 (C, C-5'), 134.8 (C, C-6'), 130.8 (C, C-1''), 127.4 (CH, C-2''), 115.9 (C, C-5), 113.7 (C, C-2'), 111.7 (C, C-4'), 110.0 (CH, C-1), 109.4 (C, C-3), 20.4 (CH<sub>3</sub>, 6-CH<sub>3</sub>), 16.8 (CH<sub>3</sub>, C-4''), 13.6 (CH<sub>3</sub>, C-3''), 9.7 (CH<sub>3</sub>, 2'-CH<sub>3</sub>). HR-ESIMS  $m/z$  403.0255 [ $\text{M} + \text{H}$ ]<sup>+</sup> (calcd for C<sub>18</sub>H<sub>18</sub>Cl<sub>3</sub>O<sub>4</sub>, 403.0271).

Nornidulin (**4**): colorless solid;  $^1\text{H}$  NMR (500 MHz, methanol- $d_4$ ):  $\delta_{\text{H}}$  5.38 (1H, q,  $J$  = 6.9 Hz, H-2'), 2.45 (3H, s, 1-CH<sub>3</sub>), 2.26 (3H, s, 9-CH<sub>3</sub>), 1.95 (3H, s, H<sub>3</sub>-4'), 1.82 (3H, d,  $J$  = 6.9 Hz, H-3');  $^{13}\text{C}$  NMR (125 MHz, methanol- $d_4$ )  $\delta_{\text{C}}$ : 163.6 (C, C-11), 158.9 (C, C-3), 155.3 (C, C-4a), 150.7 (C, C-

8), 143.3 (C, C-9a), 143.1 (C, C-1), 141.0 (C, C-5a), 136.1 (C, C-6), 131.1 (C, C-1'), 128.7 (CH, C-2'), 121.5 (C, C-2), 117.9 (C, C-9), 117.6 (C, C-7), 115.6 (C, C-11a), 111.8 (C, C-4), 19.0 (CH<sub>3</sub>, 1-CH<sub>3</sub>), 17.7 (CH<sub>3</sub>, C-4'), 14.2 (CH<sub>3</sub>, C-3'), 10.1 (CH<sub>3</sub>, 9-CH<sub>3</sub>). HR-ESIMS  $m/z$  429.0067 [M + H]<sup>+</sup> (calcd for C<sub>19</sub>H<sub>16</sub>Cl<sub>3</sub>O<sub>5</sub>, 429.0063).

Aspergillusidone B (**5**): colorless solid; <sup>1</sup>H NMR (500 MHz, methanol-*d*<sub>4</sub>):  $\delta_{\text{H}}$  6.89 (1H, s, H-2), 5.36 (1H, qq,  $J$  = 5.3, 1.9 Hz, H-2'), 3.95 (3H, s, 3-OCH<sub>3</sub>), 2.49 (3H, s, 1-CH<sub>3</sub>), 2.26 (3H, s, 9-CH<sub>3</sub>), 1.94 (3H, s, H-4'), 1.80 (3H, d,  $J$  = 6.8 Hz, H-3'); <sup>13</sup>C NMR (125 MHz, Methanol-*d*<sub>4</sub>)  $\delta_{\text{C}}$ : 163.9 (C, C-11), 160.4 (C, C-4a), 160.3 (C, C-3), 150.6 (C, C-8), 145.0 (C, C-1), 143.2 (C, C-9a), 143.2 (C, C-5a), 136.2 (C, C-6), 131.2 (C, C-1'), 128.6 (C, C-2'), 117.9 (C, C-9), 117.6 (C, C-7), 115.4 (C, C-11a), 112.5 (C, C-4), 112.2 (C, C-2), 57.3 (CH<sub>3</sub>, 3-OCH<sub>3</sub>), 21.7 (CH<sub>3</sub>, 1-CH<sub>3</sub>), 17.8 (CH<sub>3</sub>, C-4'), 14.2 (CH<sub>3</sub>, C-3'), 10.2 (CH<sub>3</sub>, 9-CH<sub>3</sub>). HR-ESIMS  $m/z$  409.0620 [M + H]<sup>+</sup> (calcd for C<sub>20</sub>H<sub>19</sub>Cl<sub>2</sub>O<sub>5</sub>, 409.0610).

Aspergillusidone C (**6**): colorless needles; <sup>1</sup>H NMR (700 MHz, methanol-*d*<sub>4</sub>):  $\delta_{\text{H}}$  6.53 (1H, s, H-4), 5.37 (1H, q,  $J$  = 6.8 Hz, H-2'), 2.46 (3H, s, 1-CH<sub>3</sub>), 2.22 (3H, s, 9-CH<sub>3</sub>), 1.95 (3H, s, H<sub>3</sub>-4'), 1.90 (3H, d,  $J$  = 6.8 Hz, H<sub>3</sub>-3'); <sup>13</sup>C NMR (175 MHz, methanol-*d*<sub>4</sub>)  $\delta_{\text{C}}$ : 164.3 (C, C-11), 162.8 (C, C-3), 159.1 (C, C-4a), 150.3 (C, C-8), 143.4 (C, C-9a), 143.1 (C, C-5a), 142.7 (C, C-1), 135.8 (C, C-6), 130.8 (C, C-1'), 127.9 (CH, C-2'), 121.1 (C, C-2), 117.8 (C, C-9), 117.2 (C, C-11a), 114.8 (C, C-7), 106.4 (CH, C-4), 18.6 (CH<sub>3</sub>, 1-CH<sub>3</sub>), 17.4 (CH<sub>3</sub>, C-4'), 13.7 (CH<sub>3</sub>, C-3'), 10.1 (CH<sub>3</sub>, 9-CH<sub>3</sub>). HR-ESIMS  $m/z$  395.0460 [M + H]<sup>+</sup> (calcd for C<sub>19</sub>H<sub>17</sub>Cl<sub>2</sub>O<sub>5</sub>, 395.0453).

Guisinol (**7**): yellow oil; <sup>1</sup>H NMR (500 MHz, methanol-*d*<sub>4</sub>):  $\delta_{\text{H}}$  6.75 (1H, d,  $J$  = 1.8 Hz, H-4'), 6.46 (1H, d,  $J$  = 1.8 Hz, H-6'), 5.83 (1H, q,  $J$  = 6.9 Hz, H-2'''), 5.28 (1H, q,  $J$  = 6.7 Hz, H-2''), 2.15 (3H, s, 3-CH<sub>3</sub>), 1.97 (3H, s, 2'-CH<sub>3</sub>), 1.96 (3H, s, H<sub>3</sub>-4'''), 1.95 (3H, s, H<sub>3</sub>-4''), 1.77 (3H, d,  $J$  = 6.9 Hz, H<sub>3</sub>-3'''), 1.72 (3H, d,  $J$  = 6.7 Hz, H<sub>3</sub>-3''); <sup>13</sup>C NMR (125 MHz, methanol-*d*<sub>4</sub>)  $\delta_{\text{C}}$ : 170.8 (C, C=O), 160.8 (C, C-4), 157.5 (C, C-2), 157.3 (C, C-1'), 151.2 (C, C-3'), 145.2 (C, C-1''), 144.1 (C, C-1'''), 136.9 (C, C-6), 135.9 (C, C-5'), 123.8 (C, C-2''), 122.9 (C, C-2'''), 116.7 (C, C-2'), 113.8 (C, C-3), 112.9 (C, C-5), 110.7 (C, C-6'), 110.6 (CH, C-4'), 106.7 (C, C-1), 17.5 (CH<sub>3</sub>, C-4''), 15.5 (CH<sub>3</sub>, C-4'''), 14.3 (CH<sub>3</sub>, C-3'''), 13.8 (CH<sub>3</sub>, C-3''), 9.5 (CH<sub>3</sub>, 2'-CH<sub>3</sub>), 9.0 (CH<sub>3</sub>, 3-CH<sub>3</sub>). HR-ESIMS  $m/z$  417.1469 [M + H]<sup>+</sup> (calcd for C<sub>23</sub>H<sub>26</sub>ClO<sub>5</sub>, 417.1469).



1-(2,6-dihydroxy-4-methoxy-3,5-dimethylphenyl)-2-methylbutan-1-one (**8**): brown oil;  $^1\text{H}$  NMR (700 MHz, methanol- $d_4$ ):  $\delta_{\text{H}}$  3.75 (1H, m,  $J = 7.1$  Hz, H-8), 3.68 (3H, s, 4-OCH<sub>3</sub>), 2.09 (3H, s, H<sub>3</sub>-13), 2.03 (3H, s, H<sub>3</sub>-12), 1.76 (1H, m, H-9a), 1.40 (1H, m, H-9b), 1.14 (3H, d,  $J = 6.8$  Hz, H<sub>3</sub>-11), 0.87 (3H, t,  $J = 7.6$  Hz, H<sub>3</sub>-10);  $^{13}\text{C}$  NMR (175 MHz, methanol- $d_4$ )  $\delta_{\text{C}}$ : 212.2 (C, C-7), 162.0 (C, C-5), 162.0 (C, C-3), 160.0 (C, C-1), 111.1 (C, C-4), 109.0 (C, C-2), 108.5 (C, C-6), 62.8 (CH<sub>3</sub>, 4-OMe), 46.5 (CH, C-8), 28.6 (CH<sub>2</sub>, C-9), 17.6 (CH<sub>3</sub>, C-11), 12.3 (CH<sub>3</sub>, C-10), 9.3 (CH<sub>3</sub>, C-13), 8.2 (CH<sub>3</sub>, C-12).

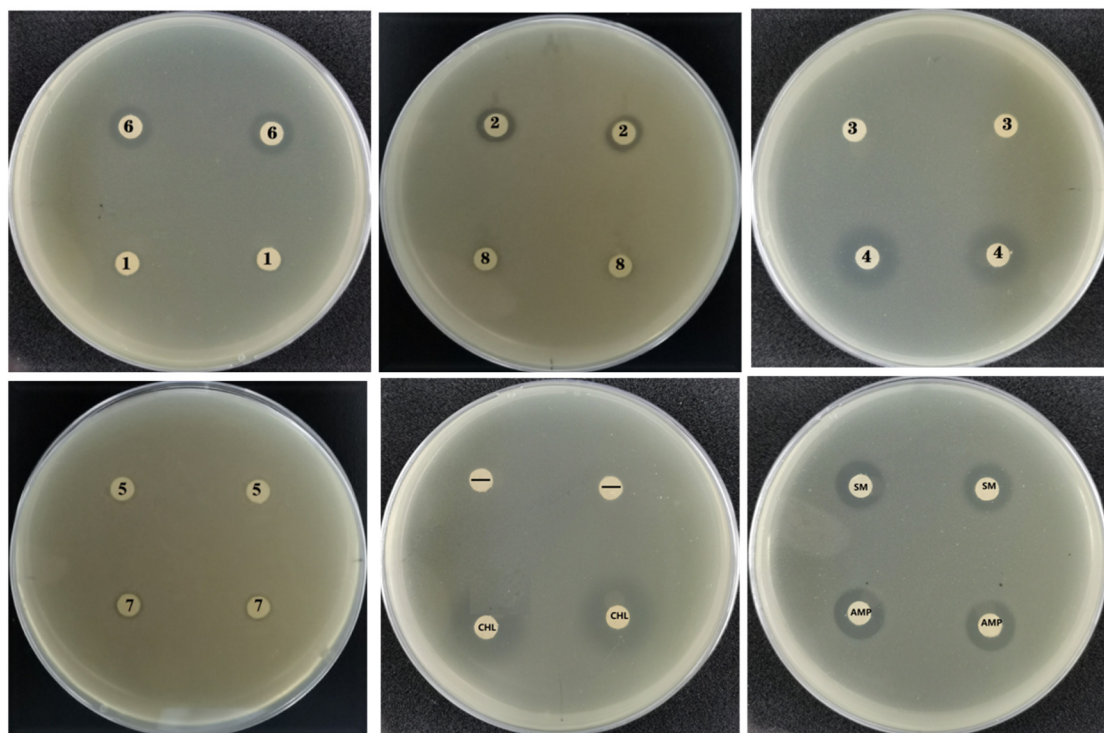

**Figure S21.** Anti-MRSA activity of compounds **1–8** by agar diffusion method. (CHL: Chloramphenicol; SM: Streptomycin; AMP: Ampicillin)

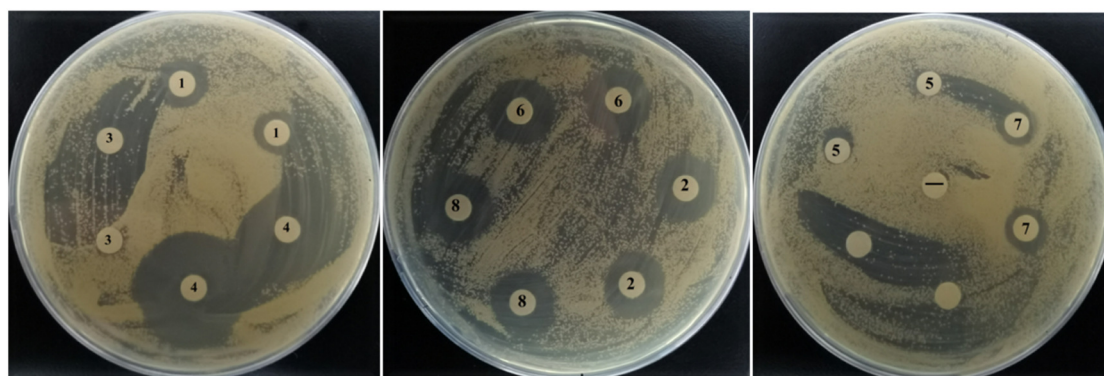

**Figure S22.** Anti-*M. variabilis* activity of compounds **1–8** by agar diffusion method.

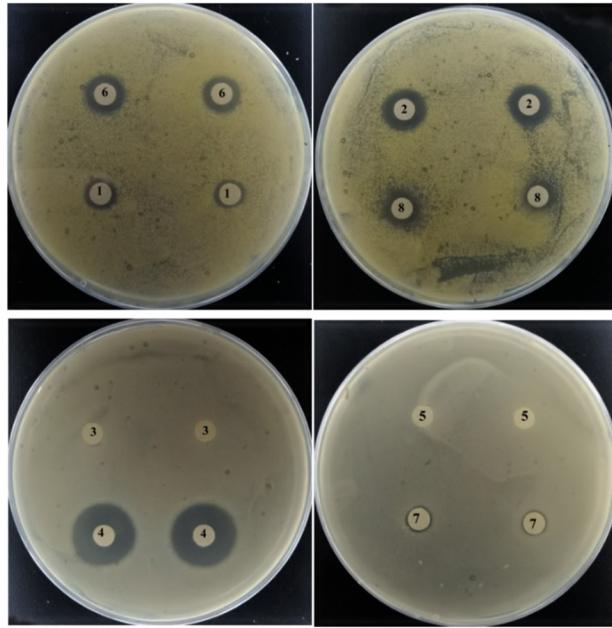

Figure S23. Anti-*M. jannaschii* activity of compounds 1–8 by agar diffusion method.

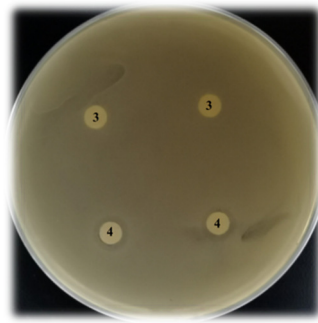

Figure S24. Anti-*V. Pelagius* activity of compound 4 by agar diffusion method.

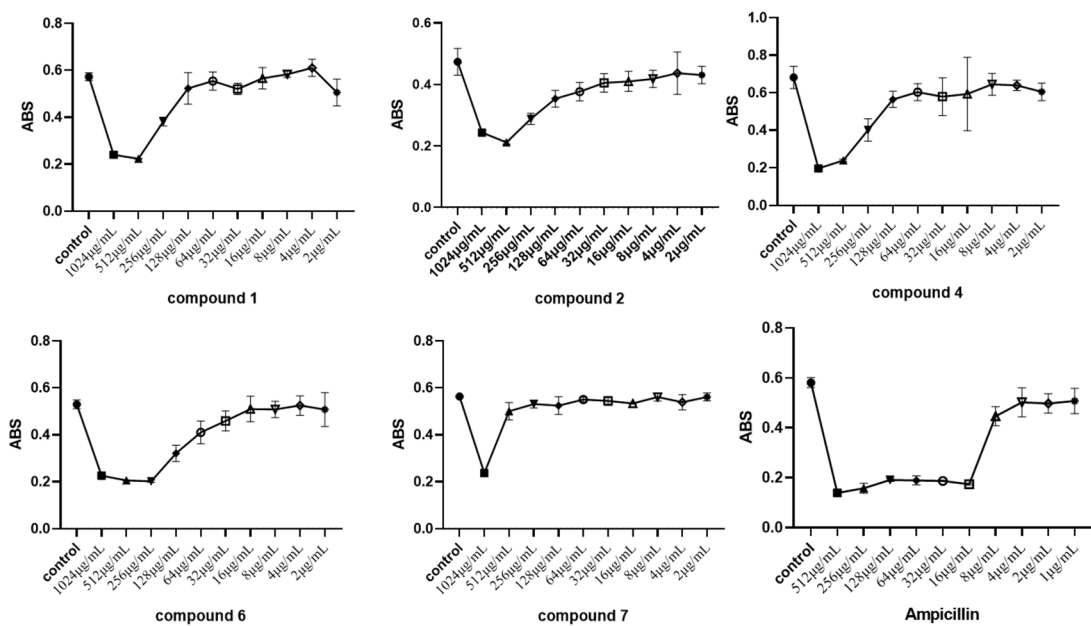

Figure S25. Anti-MRSA activity of compounds 1, 2, 4, 6, 7 and ampicillin.

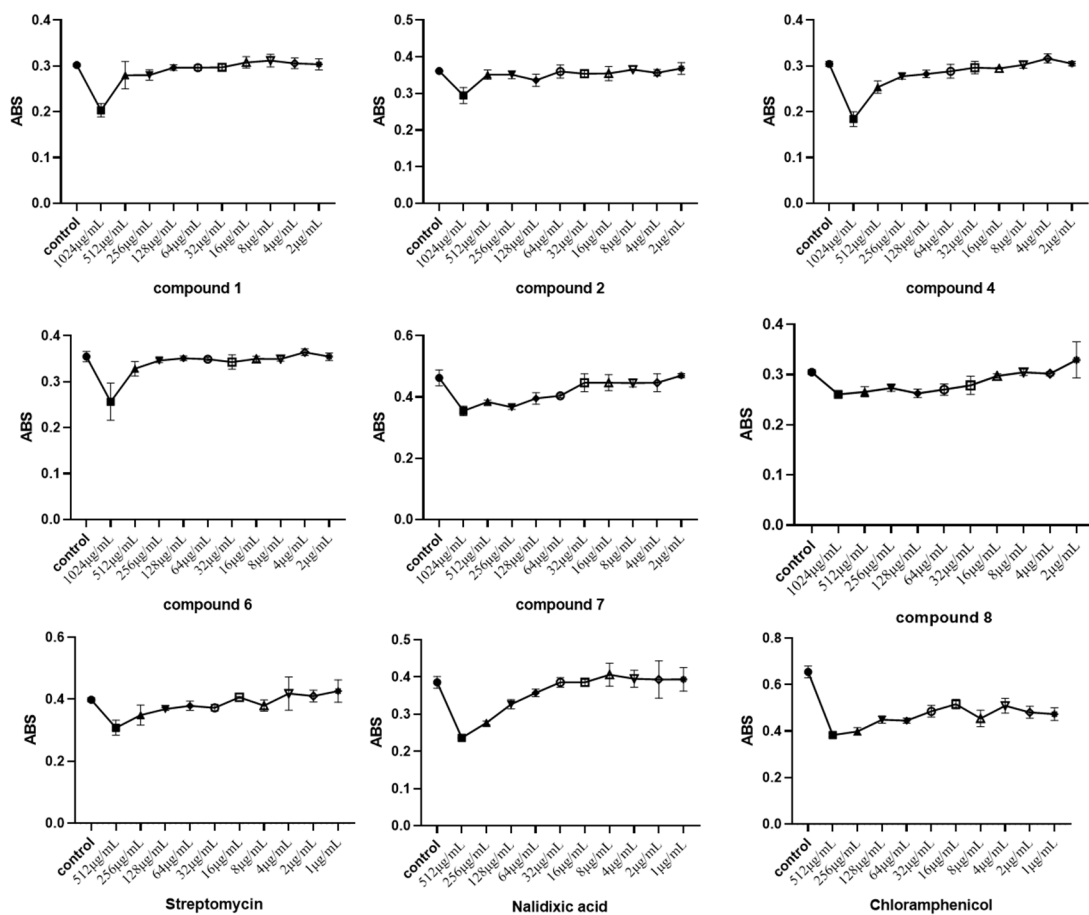

Figure S26. Anti-*M. variabilis* activity of compounds 1, 2, 4, 6-8 and positive control

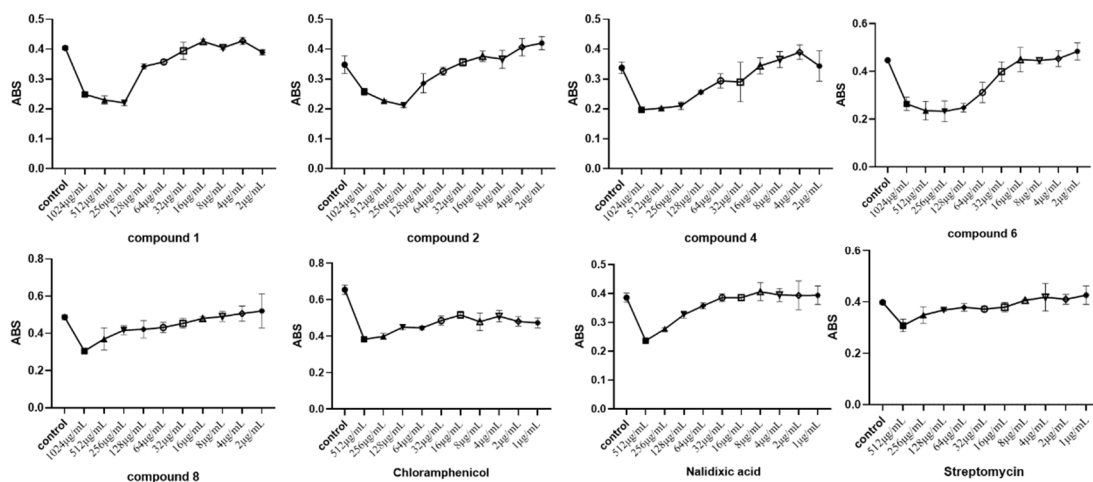

Figure S27. Anti-*M. jannaschii* activity of compounds 1, 2, 4, 6, 8 and positive control

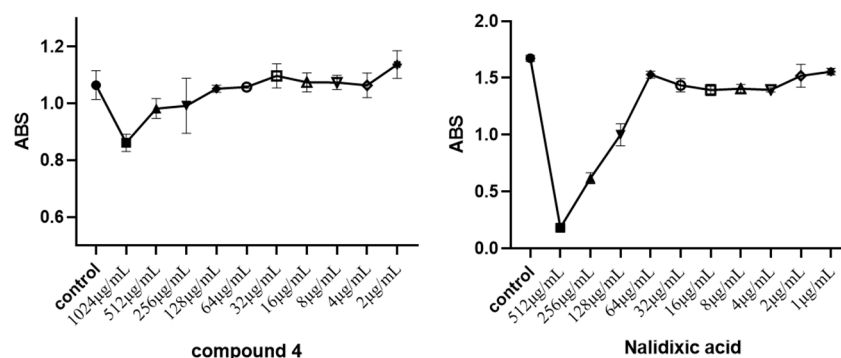

**Figure S28.** Anti-*V. Pelagius* activity of compounds **4** and nalidixic acid.

### The ITS sequence of *Aspergillus unguis* GXIMD 02505

>ITS1

TTTGTAGGAGTCGGCTGCTCGGGCGCCACCTCCCACCCTTGATACTAAACACTGTT  
GCTTCGGCGGGGAGCCCCTTCCGGGGGGCAAGCCGCCGGGGACCACTGAACTTC  
ATGCCTGAGAGTGATGCAGTCTGAGTCTGAATTATAAATCAGTCAAAACTTTCAAC  
AATGGATCTCTTGGTTCCGGCATCGATGAAGAACGCAGCGAACTGCGATAAGTAA  
TGTGAATTGCAGAAATTCAGTGAATCATCGAGTCTTTGAACGCACATTGCGCCCCCT  
GGCATTCCGGGGGGCATGCCTGTCCGAGCGTCATTGCTGCCCTTCAAGCCCGGCT  
TGTGTGTTGGGTCGTCGTCCCCCGGGGACGGGCCCCGAAAGGCAGCGGCGGC  
ACCGTGTCCGGTCCTCGAGCGTATGGGGCTTTGTCACCCGCTCGATTAGGGCCGG  
CCGGGCGCCAGCCGGCGTCATCAATCTATTTTACCAGGTTGACCTCGGATCAGGTA  
GGGATACCCGCTGAACTTAAGCATATCAATAAGCGGAGGA

>ITS4

ATACTACTGACTACTGATCGAGGTCACCTGGTAATAGATTGATGACGCCGGCTGGC  
GCCCCGCCGGCCCTAATCGAGCGGGTGACAAAGCCCCATACGCTCGAGGACCGG  
ACACGGTGCCGCCGCTGCCTTTCGGGCCCCGTCCCCGGGGGGGACGACGACCCA  
ACACACAAGCCGGGCTTGAAGGGCAGCAATGACGCTCGGACAGGCATGCCCCC  
GGAATGCCAGGGGGCGCAATGTGCGTTCAAAGACTCGATGATTCACTGAATTCTG  
CAATTCACATTACTTATCGCAGTTCGCTGCGTTCTTCATCGATGCCGGAACCAAGA  
GATCCATTGTTGAAAGTTTTGACTGATTTATAATTACAGACTCAGACTGCATCACTCT  
CAGGCATGAAGTTCAGTGGTCCCCGGCGGCTTGCCCCCGGAAGGGGCTCCCCG  
CCGAAGCAACAGTGTTTAGTATTCAAGGGTGGGAGGTTGGGCGCCCGGAGGCAG

CCCGCACTCGGTAATGATCCTTCCGCAGGTTACCTACGGAAG
